1 **Ratio-based quantitative multiomics profiling using universal**  
2 **reference materials empowers data integration**

3

4 Yuanting Zheng<sup>1#\*</sup>, Yaqing Liu<sup>1#</sup>, Jingcheng Yang<sup>1,2#</sup>, Lianhua Dong<sup>3#</sup>, Rui  
5 Zhang<sup>4#</sup>, Sha Tian<sup>1#</sup>, Ying Yu<sup>1</sup>, Luyao Ren<sup>1</sup>, Wanwan Hou<sup>1</sup>, Feng Zhu<sup>1</sup>,  
6 Yuanbang Mai<sup>1</sup>, Jinxiong Han<sup>5</sup>, Lijun Zhang<sup>5</sup>, Hui Jiang<sup>6</sup>, Ling Lin<sup>7</sup>, Jingwei  
7 Lou<sup>7</sup>, Ruiqiang Li<sup>8</sup>, Jingchao Lin<sup>9</sup>, Huafen Liu<sup>10</sup>, Ziqing Kong<sup>10</sup>, Depeng Wang<sup>11</sup>,  
8 Fangping Dai<sup>12</sup>, Ding Bao<sup>1</sup>, Zehui Cao<sup>1</sup>, Qiaochu Chen<sup>1</sup>, Qingwang Chen<sup>1</sup>,  
9 Xingdong Chen<sup>1</sup>, Yuechen Gao<sup>1</sup>, He Jiang<sup>1</sup>, Bin Li<sup>1</sup>, Bingying Li<sup>1</sup>, Jingjing Li<sup>1,11</sup>,  
10 Ruimei Liu<sup>1</sup>, Tao Qing<sup>1</sup>, Erfei Shang<sup>1</sup>, Jun Shang<sup>1</sup>, Shanyue Sun<sup>1</sup>, Haiyan  
11 Wang<sup>1</sup>, Xiaolin Wang<sup>1</sup>, Naixin Zhang<sup>1</sup>, Peipei Zhang<sup>1</sup>, Ruolan Zhang<sup>1</sup>, Sibao  
12 Zhu<sup>1</sup>, Andreas Scherer<sup>13,14</sup>, Jiucun Wang<sup>1</sup>, Jing Wang<sup>3</sup>, Joshua Xu<sup>15</sup>, Huixiao  
13 Hong<sup>15</sup>, Wenming Xiao<sup>16</sup>, Xiaozhen Liang<sup>17</sup>, Li Jin<sup>1</sup>, The Quartet Project Team,  
14 Weida Tong<sup>15</sup>, Chen Ding<sup>1\*</sup>, Jinming Li<sup>4\*</sup>, Xiang Fang<sup>3\*</sup>, Leming Shi<sup>1,18\*</sup>  
15

16 <sup>1</sup>State Key Laboratory of Genetic Engineering, School of Life Sciences and  
17 Human Phenome Institute, Fudan University, Shanghai, China.

18 <sup>2</sup>Greater Bay Area Institute of Precision Medicine, Guangzhou, Guangdong,  
19 China.

20 <sup>3</sup>National Institute of Metrology, Beijing, China.

21 <sup>4</sup>National Center for Clinical Laboratories, Institute of Geriatric Medicine,  
22 Chinese Academy of Medical Sciences, Beijing Hospital, Beijing, China.

23 <sup>5</sup>Nanjing Vazyme Biotech Co. Ltd., Nanjing, Jiangsu, China.

24 <sup>6</sup>MGI, BGI-Shenzhen, Shenzhen, Guangdong, China.

25 <sup>7</sup>Zhangjiang Center for Translational Medicine, Shanghai Biotecan Medical  
26 Diagnostics Co., Ltd, Shanghai, China.

27 <sup>8</sup>Novogene Bioinformatics Institute, Beijing, China.

- 28 <sup>9</sup>Metabo-Profile Biotechnology (Shanghai) Co. Ltd., Shanghai, China.
- 29 <sup>10</sup>Calibra Diagnostics, Hangzhou, Zhejiang, China.
- 30 <sup>11</sup>Nextomics Biosciences Institute, Wuhan, Hubei, China.
- 31 <sup>12</sup>Genome Decoding Institute, Nantong, Jiangsu, China.
- 32 <sup>13</sup>Institute for Molecular Medicine Finland (FIMM), University of Helsinki,  
33 Helsinki, Finland.
- 34 <sup>14</sup>EATRIS ERIC- European Infrastructure for Translational Medicine,  
35 Amsterdam, the Netherlands.
- 36 <sup>15</sup>Division of Bioinformatics and Biostatistics, National Center for Toxicological  
37 Research, US Food and Drug Administration, Jefferson, Arkansas, USA.
- 38 <sup>16</sup>Office of Oncologic Diseases, Office of New Drugs, Center for Drug  
39 Evaluation and Research, US Food and Drug Administration, Silver Spring,  
40 Maryland, USA.
- 41 <sup>17</sup>Institut Pasteur of Shanghai, Chinese Academy of Sciences, Shanghai, China.
- 42 <sup>18</sup>Cancer Institute, Shanghai Cancer Center, Fudan University, Shanghai,  
43 China.
- 44
- 45 #These authors contributed equally: Yuanting Zheng, Yaqing Liu, Jingcheng  
46 Yang, Lianhua Dong, Rui Zhang, Sha Tian.
- 47
- 48 \*Corresponding authors' e-mail addresses: zhengyuanting@fudan.edu.cn,  
49 chend@fudan.edu.cn, jmli@nccl.org.cn, fangxiang@nim.ac.cn,  
50 lemingshi@fudan.edu.cn

## 51 **Abstract**

52 Multiomics profiling is a powerful tool to characterize the same samples with  
53 complementary features orchestrating the genome, epigenome, transcriptome,  
54 proteome, and metabolome. However, the lack of ground truth hampers the  
55 objective assessment of and subsequent choice from a plethora of  
56 measurement and computational methods aiming to integrate diverse and often  
57 enigmatically incomparable omics datasets. Here we establish and  
58 characterize the first suites of publicly available multiomics reference materials  
59 of matched DNA, RNA, proteins, and metabolites derived from immortalized  
60 cell lines from a family quartet of parents and monozygotic twin daughters,  
61 providing built-in truth defined by family relationship and the central dogma. We  
62 demonstrate that the “ratio”-based omics profiling data, *i.e.*, by scaling the  
63 absolute feature values of a study sample relative to those of a concurrently  
64 measured universal reference sample, were inherently much more reproducible  
65 and comparable across batches, labs, platforms, and omics types, thus  
66 empower the horizontal (within-omics) and vertical (cross-omics) data  
67 integration in multiomics studies. Our study identifies “absolute” feature  
68 quantitation as the root cause of irreproducibility in multiomics measurement  
69 and data integration, and urges a paradigm shift from “absolute” to “ratio”-based  
70 multiomics profiling with universal reference materials.

71 **Keywords:** Ratio, reference materials, multiomics, central dogma, data  
72 integration, performance metrics, Quartet Project, between-sample differences,  
73 paradigm shift, MAQC

74 Multiomics profiling is a new approach where biomolecules across multiple  
75 omics layers including genomics, epigenomics, transcriptomics, proteomics,  
76 and metabolomics are fully measured, analyzed, and integrated from the same  
77 set of samples on a genome scale in terms of the number of measured  
78 features<sup>1-3</sup>. Multiomics profiling quantifies biologically different signals across  
79 complementary omics layers, therefore promises to demonstrate significant  
80 advantages over any single omics type to explore the intricacies of  
81 interconnections between multiple layers of biological molecules and to identify  
82 system-level biomarkers<sup>4-8</sup>. Technology innovations and cost reduction have  
83 empowered increasingly large-scale multiomics studies for data collection on  
84 the same group of individuals, providing a revolutionary opportunity to fully  
85 understand and yield high-level insights into human diseases in a holistic  
86 fashion<sup>9-14</sup>.

87 Multiomics data integration can be classified into two categories depending  
88 on their objectives<sup>15</sup>. When the objective is on samples, the common multiomics  
89 integration strategy is data-driven clustering or classification of biological  
90 samples by combining complementary information contained in the multiomics  
91 data, followed by extracting system-level biologically differentiated networks for  
92 the endpoints such as wellness or disease subtyping<sup>16-19</sup>, or longitudinal  
93 trajectories<sup>20-22</sup>. When the objective is on the measured features, the data  
94 integration strategy is to identify significant multilayered molecular networks, so  
95 as to reveal the perturbed signatures and potential actionable targets for  
96 disease prevention and treatment<sup>23-31</sup>. Given the complexity of tying together  
97 multiomics data with unprecedented dimensionality and diversity, assigning  
98 accurate sample groups, and extracting true biological networks are  
99 challenging<sup>15, 32, 33</sup>. Moreover, large-scale consortia based multiomics data are  
100 often generated across platforms, labs, and batches, creating unwanted  
101 variations and multiplying the complexities. Therefore, efficient data integration  
102 is essential for reliable multiomics studies<sup>32</sup>.

103 The data integration tasks in large-scale multiomics studies usually fall into  
104 two categories of application scenarios<sup>34</sup>. Horizontal (within-omics) integration,  
105 *i.e.*, integration of diverse datasets from a single omics type, aims to combining  
106 multiple datasets across multiple batches, technologies, and labs from the

107 same omics type for downstream analysis. Unwanted variations can result in  
108 systematic deviations (knowns as batch effects) confounded with critical study  
109 factors<sup>35, 36</sup>. Currently, various horizontal integration methods for bulk and  
110 single-cell omics data are available<sup>37-39</sup>. However, the selection of horizontal  
111 integration methods based on arbitrary visualizations of integrated datasets is  
112 challenging due to the lack of ground truth and objective quality control (QC)  
113 metrics for method selection. Vertical (cross-omics) integration, *i.e.*, integration  
114 of diverse datasets from multiomics types, aims to combining multiple omics  
115 datasets with different modalities from the same set of samples, followed by  
116 designing appropriate downstream analysis to identify accurate sample groups,  
117 or multilayered and interconnected networks of biomolecular features<sup>6, 34, 40, 41</sup>.

118 Devising proper vertical integration strategies for sample clustering or  
119 feature identification is challenging in multiomics profiling. First, different  
120 technologies result in varying numbers of features and statistical properties,  
121 which can have a strong influence on the integration step to appropriately select  
122 and weigh different modalities. Secondly, each omics dataset has its intrinsic  
123 technological limits and noise structure. Combining multiomics datasets also  
124 multiply all the technical noises across different technologies, making it more  
125 challenging to integrate multiple datasets. Thirdly, many multiomics data  
126 integration algorithms and software are developed based on different statistical  
127 principles and assumptions<sup>42-44</sup>. Each multiomics integration method can report  
128 a solution, but assessing its reliability is difficult due to the lack of multiomics  
129 “ground truth” and QC methods for these complex processes.

130 Multiomics reference materials and relevant QC metrics are required for  
131 quality assessment of each omics measurement and its horizontal integration  
132 before successful multiomics-level vertical data integration<sup>45-48</sup>. Unrelated  
133 reference materials have been widely used as “ground truth” for performance  
134 evaluation of technologies for the same omics type, such as the genomic DNA<sup>49,</sup>  
135 <sup>50</sup>, tumor-normal paired DNA<sup>51-53</sup>, RNA, protein, or metabolite reference  
136 materials<sup>54-57</sup>. However, multiomics profiling requires measuring multiple types  
137 of omics data from the same set of interconnected reference samples, thus  
138 allowing for assessment of the ability to distinguish different reference samples  
139 with integrated datasets. Moreover, DNA, RNA, protein, and metabolite

140 reference materials should be prepared simultaneously, which can provide  
141 “built-in truth” (the central dogma) for validating the hierarchical relationship  
142 among identified features. Therefore, publicly accessible and well-  
143 characterized multiomics reference materials at the genome scale are urgently  
144 needed<sup>47</sup>. Importantly, QC metrics relevant to research purposes are also  
145 critically important for assessing the quality of multiomics profiling. Precision  
146 and recall are widely used QC metrics for qualitative genomic variant calling<sup>58-  
147 60</sup>, whereas correlation coefficient is widely used for quantitative omics  
148 profiling<sup>55, 56, 61-64</sup>. However, multiomics profiling is an integrated process,  
149 therefore the QC process should be performed based on the entire sample-to-  
150 result pipelines. Integrating multiomics information for more robust sample  
151 classifiers and multilayered interconnected molecular signatures are the major  
152 goals for multiomics profiling. Therefore, QC metrics should be related to these  
153 two research objectives, and should be suitable for evaluating the performance  
154 of each omics type ranging from data generation to multiomics data integration.

155 We launched the Quartet Project ([chinese-quartet.org](http://chinese-quartet.org)) to provide  
156 multiomics “ground truth” as well as best practices for the QC and data  
157 integration of multiomics profiling. The Quartet multiomics reference material  
158 suites, *i.e.*, DNA, RNA, proteins, and metabolites developed from the B-  
159 lymphoblastoid cell lines derived from a quartet family of parents and  
160 monozygotic twin daughters, were designed for objectively evaluating the wet-  
161 lab proficiency in data generation and reliability of computational methods for  
162 horizontal data integration of the same omics type and for vertical data  
163 integration of multiomics types. A broad collection of the Quartet multiomics  
164 data generated from key technologies provides resources for evaluating the  
165 performance of new labs, platforms, protocols, and analytical tools. Based on  
166 the pedigree information of the Quartet samples, the horizontal and vertical data  
167 integration performance can be objectively evaluated, which provides unique  
168 insights into the commonly used multiomics integration strategies. We also  
169 developed a user-friendly data portal for the community to conveniently utilize  
170 and improve the Quartet resources ([chinese-quartet.org](http://chinese-quartet.org)). Most importantly, our  
171 study identifies “absolute” feature quantitation as the root cause of  
172 irreproducibility in multiomics measurement and data integration, and urges a  
173 paradigm shift from “absolute” to “ratio”-based quantitative multiomics profiling.

## 174 Results

175 **Overview of the Quartet Project.** The Quartet Project provides the community  
176 with multiomics reference materials and reference datasets for objectively  
177 assessing quality in data generation and integrated analysis in increasingly  
178 large-scale multiomics studies (**Fig. 1a**). Large quantities of multiomics  
179 reference materials suites (DNA, RNA, protein, and metabolite) were  
180 established simultaneously from the same immortalized B-lymphoblastoid cell  
181 lines (LCLs) of a Chinese Quartet family from the Fudan Taizhou Cohort<sup>65</sup>  
182 (**Extended Data Fig. 1**), including father (F7), mother (M8), and monozygotic  
183 twin daughters (D5 and D6). As summarized in **Table 1**, each reference  
184 material was stocked in more than 1000 vials. They are suitable for a wide  
185 range of multiomics technologies, including DNA sequencing, DNA methylation,  
186 RNAseq, miRNAseq, LC-MS/MS based proteomics and metabolomics.  
187 Importantly, the DNA and RNA reference material suites have been approved  
188 by China's State Administration for Market Regulation as the First Class of  
189 National Reference Materials and are extensively being utilized for proficiency  
190 testing and method validation. The Quartet multiomics design provides two  
191 types of “built-in truth” for quality assessment of multiomics profiling. One is the  
192 ability to correctly classify Quartet multiple samples, which is related to the  
193 multiomics research purpose of sample clustering. The metrics that measure  
194 the ability to correctly classify different Quartet samples are suitable for quality  
195 assessment of data generation and data analysis for each omics type. The  
196 other type of metric measures the ability to correctly identify the hierarchical  
197 relationships across multiomics features according to the rule of the central  
198 dogma, which can be used for assessing the reliability of correlation-based  
199 multiomics network integration.

200 The Quartet multiomics reference material suites were profiled across the  
201 commonly used multiomics platforms for comprehensive performance  
202 evaluation (**Fig. 1b**), including seven DNA sequencing platforms, one DNA  
203 methylation platform, two RNAseq platforms, two miRNAseq platforms, nine  
204 LC-MS/MS based proteomics platforms, and five LC-MS/MS based  
205 metabolomics platforms (**Extended Data Table 1**). Three technical replicates  
206 for each reference material were measured in each lab for performance  
207 evaluation, except for the long-reads DNA sequencing platforms where only

208 one replicate was sequenced for each platform. **Extended Data Table 1**  
209 summarized the Quartet multiomics datasets for the real-world assessment of  
210 commonly used multiomics technologies. All the data can be accessed from the  
211 Quartet Data Portal ([chinese-quartet.org](http://chinese-quartet.org)), which provides a landscape of data  
212 quality for each type of omics profiling.

213 QC of multiomics profiling can be achieved using the Quartet multiomics  
214 reference materials. For data generation of each omics profiling, the Quartet  
215 built-in QC metrics, i.e., Mendelian concordance rate for genomic variant call  
216 and Signal-to-Noise Ratio (SNR) for quantitative omics profiling, enable  
217 proficiency testing on a whole-genome scale, which is essential for multiomics  
218 discovery studies (**Fig. 1c**). We proposed the ratio-based scaling using  
219 reference materials to empower horizontal and vertical omics data integration.  
220 The ratio-based data were derived by scaling the absolute feature values of  
221 study samples (D5, F7, and M8) relative to those of a concurrently measured  
222 reference sample (D6) on a feature-by-feature basis (**Fig. 1d**). In addition, the  
223 Quartet Project design provides two types of QC metrics to evaluate the  
224 reliability of vertical data integration for sample clustering. One QC metric is the  
225 cross-omics feature relationships that follow the rule of the central dogma.  
226 Another QC metric is to classify the Quartet samples correctly for both four  
227 different individuals (daughter1-daughter2-father-mother) and genetically  
228 driven three clusters (daughters-father-mother) (**Fig. 1d**). A reliable vertical  
229 integration method needs to be able to discover the intricate biological  
230 differences under these scenarios.

231 In this article, we described the overview of the Quartet Project, including  
232 the performance of multiomics technologies and data integration strategies,  
233 and the best practice guidelines for process control of large-scale multiomics  
234 studies using the Quartet reference materials (**Extended Data Fig. 2**). Four  
235 accompanying papers detailed the establishment of the DNA<sup>66</sup>, RNA<sup>67</sup>,  
236 protein<sup>68</sup>, and metabolite<sup>69</sup> reference materials, reference datasets, and QC  
237 methods for each type of omics profiling (genomics, transcriptomics,  
238 proteomics, and metabolomics, respectively) and their applications. Another  
239 paper<sup>70</sup> was dedicated to addressing the widespread problem of batch effects  
240 present in each and every type of omics data. We also developed the Quartet



241 Data Portal ([chinese-quartet.org](http://chinese-quartet.org))<sup>71</sup> for the community to conveniently access  
242 and share the Quartet multiomics resources according to the regulation of the  
243 Human Genetic Resources Administration of China (HGRAC).

244

245 **Wet-lab proficiency in data generation varies substantially within every**  
246 **omics type.** The performance of each omics platform in different labs was  
247 assessed using the Quartet multiomics reference materials. Except for the long-  
248 reads sequencing platforms, the reference materials were profiled within a  
249 batch in a lab (4 samples × 3 replicates). For long-reads sequencing, one  
250 replicate for each reference material was sequenced, and the resulting data  
251 were analyzed using 11 pipelines, therefore the performance evaluation was  
252 conducted only at the analytical procedure level. Details on data generation and  
253 analysis were given in the Methods section.

254 QC metrics for objective performance evaluation are critically important.  
255 The number of measured features, coefficient of variation (CV), and technical  
256 reproducibility are widely used QC metrics across different omics platforms, and  
257 were used in our study for cross-omics performance comparisons. As shown in  
258 **Fig. 2**, the number of features measured by each omics type varied by several  
259 orders of magnitude, from 60 metabolites to 4.8 million DNA small variants  
260 (SNVs and Indels) (**Fig. 2a**) per sample. Within each omics type, the number  
261 of features detected varied among batches and labs. There were no obvious  
262 differences in the numbers of detected small variants between Illumina and BGI  
263 platforms, with each platform detecting approximately 4.8 million small variants.  
264 However, the numbers of detected proteins among different LC-MS/MS based  
265 proteomics platforms were more profound. The reproducibility of detected  
266 features in each omics profiling was evaluated using the number of replicates  
267 supporting a variant call for genomics and the coefficient of variation (CV) in  
268 quantitative omics profiling among technical replicates within a batch (**Fig. 2b**).  
269 Most SNVs were supported by all the three library replicates within the batch  
270 (Jaccard index of ~0.94 for SNVs), whereas the number of analytical repeats  
271 supporting a structural variant (SV) call greatly varied (Jaccard index of ~0.70  
272 for SVs), indicating large differences in SV calling among analytical pipelines.

273 For quantitative omics profiling, the CVs of most quantified features were  
274 below 30%. In addition, the reproducibility of technical replicates was also  
275 evaluated at individual sample level (**Fig. 2c**). Reproducibility was calculated  
276 as the Jaccard index from three library repeats within a batch. For the short-  
277 reads sequencing platforms, all Jaccard index values were above 93%.  
278 Moreover, the reproducibility of SV from 11 call sets using different analytical  
279 pipelines was between 80% and 90%. Nanopore was found to be more  
280 reproducible than PacBio among the long-read sequencing platforms. The  
281 reproducibility of quantitative omics profiling was calculated as the Pearson  
282 correlation coefficient (Pearson  $r$ ) of technical replicates within a batch. The  $r$   
283 values from all labs and metabolomic platforms were above 95%, indicating  
284 high reproducible in metabolomic profiling for the same sample. However, the  
285  $r$  values for repeated measurements of the same sample were between 88.42%  
286 and 97.62% for transcriptomics, or from 82.37% to 99.34% for proteomics (**Fig.**  
287 **2c**).

288 Based on the Quartet multi-sample design, we defined two QC metrics to  
289 measure the ability to identify intrinsic biological differences among various  
290 groups of samples, a key objective of omics profiling. The Quartet based Signal-  
291 to-Noise Ratio (SNR) is the ratio of inter-sample differences (*i.e.*, “signal”) to  
292 intra-sample differences among technical replicates (*i.e.*, “noise”). It is  
293 calculated as the ratio of the average distance between the Quartet samples to  
294 the average distance between technical replicates of the same sample (see  
295 Methods for details). For a measurement method with high resolution in  
296 differentiating biologically different groups of samples, the inter-sample  
297 differences of Quartet samples should be much larger than the variation among  
298 technical replicates of the same sample. Principal component analysis (PCA)  
299 showed clear separation among the Quartet samples (D5, D6, F7, and M8) for  
300 high-quality profiling experiments (**Extended Data Fig. 3a**) but not for low-  
301 quality profiling experiments (**Extended Data Fig. 3b**). Strikingly, high  
302 variabilities in intra-batch data quality were observed in each omics platform  
303 (**Fig. 2d**), especially for the quantitative omics platforms, such as  
304 transcriptomics (SNR range 8.7 – 31.0, SD=7.1), miRNA profiling (SNR range  
305 1.9 – 20.5, SD=6.8), proteomics (SNR range 0.9 – 30.5, SD=7.5), and  
306 metabolomics (SNR range 4.6 – 27.1, SD=5.1). Moreover, variabilities within

307 the same technology platform were higher compared to those between different  
308 platforms of the same omics type. For example, both high and low SNRs were  
309 observed in RNAseq for the Illumina and BGI platforms, but the average SNRs  
310 of the two sequencing platforms were very close (20.39 vs. 19.54,  $p=0.84$ ).  
311 Similarly, high variabilities in SNR were observed within each MS platform for  
312 proteomics or metabolomics profiling. These results implied that proficiency of  
313 an individual wet-lab, instead of a specific platform itself, was a more important  
314 factor affecting the reliability of data generation for each omics type.

315 In addition, we constructed high-confidence reference datasets of  
316 differentially expressed features (DEFs) in terms of the level of differential  
317 expression between a pair of samples (D5/F7, D5/M8, and F7/M8) for each  
318 quantitative omics profiling using a consensus-based integration strategy  
319 (**Extended Data Fig. 4**). Therefore, the Root Mean Square Error (RMSE) was  
320 used for quantitatively evaluating the consistency between a test dataset with  
321 the high-confidence reference dataset (**Fig. 2e**). One major goal of each omics  
322 profiling is to identify molecular features that are intrinsically different between  
323 distinct sample groups such as disease versus normal, or responders versus  
324 non-responders to a drug treatment. Thus, the ability to accurately differentiate  
325 biologically different groups of samples is a critical metric for measuring the  
326 performance of a technology, procedure, or lab.

327 We explored the relationships between SNR and the number of detected  
328 features, the reproducibility of features, the reproducibility of technical  
329 replicates, and the RMSE of DEFs for identifying quality issues in quantitative  
330 omics profiling (**Extended Data Fig. 5**). These data suggested that high  
331 correlation coefficients between repeated measures of the same sample did not  
332 guarantee high resolution (SNR) in identifying inherent differences (*i.e.*,  
333 biological signals) among various biological sample groups. Therefore, multi-  
334 sample-based QC metrics are needed in identifying labs with low proficiency in  
335 detecting intrinsic biological differences among sample groups.

336

337 **Ratio-based scaling enables horizontal integration of data across**  
338 **platforms, labs, and batches for the same omics type.** In large-scale omics  
339 studies, reliability of horizontal integration of omics datasets across different

340 platforms, labs, or batches for the same omics type is even more challenging  
341 compared to within-batch proficiency mentioned above. If the Quartet reference  
342 materials were profiled per-batch along with study samples in each lab, the  
343 reliability of horizontal integration could be assessed by the Quartet multi-  
344 sample based SNR. Horizontally integrated datasets should have the ability to  
345 differentiate the Quartet samples. In order to evaluate the reliability of horizontal  
346 integration of each omics profiling in differentiating the four sample groups in  
347 the Quartet design, we integrated datasets for all batches of the same omics  
348 type separately, including methylation array data (M value), miRNAseq  
349 (log<sub>2</sub>CPM), RNAseq (log<sub>2</sub>FPKM), proteomics (log<sub>2</sub>FOT), and metabolomics  
350 (log<sub>2</sub>Intensity) (**Fig. 3**).

351 Horizontal integration of the aforementioned five types of quantitative  
352 omics data all showed obvious batch-dominant clustering at absolute  
353 expression levels (**Fig. 3a** top). However, after converting the absolute omics  
354 data to a ratio scale relative to the same reference material (D6) within a batch  
355 on a feature-by-feature basis, PCA plots showed clear separation of the four  
356 types of reference samples (D5, D6, F7, and M8) and the drastic batch effects  
357 seen at the absolute scale largely disappeared (**Fig. 3a** bottom). We further  
358 quantitatively measured the quality of horizontal data integration using the  
359 Quartet multi-sample based SNR as the metric. A method of good quality for  
360 horizontal data integration at each omics level would clearly separate the four  
361 Quartet sample groups, *i.e.*, the inter-sample differences of the Quartet  
362 samples should be much larger than the variation among technical replicates.  
363 As shown in **Fig. 3a**, the SNR after horizontal integration of datasets for each  
364 omics type at the absolute level was all close to zero except for methylation  
365 data (**Fig. 3a** top), whereas the SNR of the integrated datasets dramatically  
366 increased at the ratio level (**Fig. 3a** bottom). Importantly, these conclusions  
367 remain the same if one chooses D5, F7, or M8 instead of D6 as the reference  
368 sample (**Extended Data Fig. 6**), indicating the universal applicability of the  
369 ratio-based scaling approach.

370 In addition, we characterized the impact of the level of batch effect on  
371 horizontal-integration SNR by randomly selecting samples from different  
372 batches and using the average of the Jaccard index of the batches from the

373 four sample groups as a measure of group-batch balance. As shown in **Fig. 3b**,  
374 regardless of the level of balance of sample classes across batches, horizontal  
375 integration at the ratio level resulted in much better discrimination between  
376 sample classes, *i.e.*, much higher SNR. However, the corresponding SNR at  
377 the absolute level was all close to zero except for methylation data, whether  
378 there was a group-batch balance or not. These results clearly demonstrated  
379 that quantitative omics profiling at the ratio level was much more comparable  
380 and suitable for horizontal integration than at the absolute level.

381 Ratio-based profiling allows for more accurate determination of the subtle  
382 differences between two Quartet samples on a feature-by-feature basis. For all  
383 three comparisons (D5/F7, D5/M8, and F7/M8), compared to the log<sub>2</sub> fold  
384 differences of the absolute-based integration data, those of the ratio-based  
385 integration data showed a higher level of agreement (and lower RMSE) with the  
386 corresponding reference dataset for each omics type (**Figs. 3c** and **3d**).  
387 Furthermore, the level of balance of sample groups between batches was  
388 helpful for the accurate detection of DEFs. This was reflected in the negative  
389 correlation between RMSE and the level of group-batch balance (**Fig. 3d**). It  
390 was also clear that the lack of group-batch balance affected absolute-based  
391 data integration much more severely than ratio-based data integration, where  
392 the former showed a much larger slope than the latter (**Fig. 3d**).

393 The pervasiveness of batch effects in quantitative analysis techniques at  
394 the absolute expression level presents a real challenge for horizontal  
395 integration. Our results demonstrated that the conversion of quantitative omics  
396 data to a ratio scale relative to a common reference sample (*e.g.*, the Quartet  
397 D6 sample) can effectively mitigate the detrimental impact of batch effects on  
398 sample classification, differential feature identification, etc.

399

400 **Ratio-based scaling facilitates vertical integration of data from different**  
401 **omics types.** In large multiomics studies, the multiomics datasets are usually  
402 generated in multiple batches, platforms, and labs. Vertical integration of  
403 multiomics datasets from various omics types is typically performed after  
404 horizontal integration at the same omics type, thus the final integration  
405 performance is influenced by both horizontal and vertical dimensions.

406 Therefore, we evaluated the reliability of vertical integration of horizontally  
407 integrated ratio-based data under different scenarios.

408 One advantage of multiomics studies is to systematically discover the  
409 cross-omics relationships from multiple interconnected biological layers. The  
410 Quartet multiomics design can provide the “built-in truth” from the hierarchical  
411 relationships across omics features. Since the Quartet multiomics reference  
412 materials were derived from the same batch of cultured cells, the generated  
413 multiomics data can be used to evaluate their compliance with the central  
414 dogma principle, *i.e.*, how the genetic information is transcribed from DNA to  
415 RNA, and then translated to protein. The central dogma-regulated relationships  
416 between cross-omics features can be measured using the correlation  
417 coefficient, which is one of the simplest ways to estimate the pairwise relevance  
418 between two types of omics features, forming the basis of multiomics  
419 integration for network analysis.

420 Cross-omics feature relationships calculated based on multiple batches of  
421 data integrated at the ratio level (Inter-batch) showed stronger correlations with  
422 the cross-omics single batches (Intra-batch) than that at the absolute level (**Fig.**  
423 **4a**). These cross-feature correlations of methylation-miRNA, methylation-RNA,  
424 miRNA-RNA, RNA-protein, and protein-metabolite were derived from features  
425 of both omics types associated with the same genes, which may more closely  
426 follow the principle of the central dogma. In particular, for the relationships  
427 between proteins and metabolites, direct integration of multi-batch data at the  
428 absolute level could not easily identify the true correlations between cross-  
429 omics feature pairs.

430 To more accurately measure the effect of integration based on ratio  
431 profiling, we constructed the Quartet reference datasets of the Pearson  
432 correlation coefficients between the expression levels of two different types of  
433 omics features in order to evaluate the performance of vertical integration at the  
434 feature relationship levels (**Extended Data Fig. 7**). The central dogma was  
435 reflected in the Quartet multiomics data as the abundance of RNAs was almost  
436 exclusively positively correlated with that of proteins in the reference dataset  
437 (224 RNA-protein pairs were positively correlated and no RNA-protein pair was  
438 negatively correlated). In agreement with **Fig. 4a**, the concordance of

439 correlation coefficients of cross-omics features with the reference Pearson  $r$   
440 was higher (as indicated by lower RMSEs) in the horizontally integrated data  
441 based on the ratio level compared to absolute level (**Fig. 4b**).

442 Another advantage of vertical integration of multiomics data is to be able  
443 to distinguish subtypes of clinical samples with subtle differences that cannot  
444 be identified based on a single type of omics data. Therefore, the ability to  
445 discover the true biological differences between sample groups is a key metric  
446 to measure the performance of multiomics integration tools and procedures.  
447 The multi-sample and multiomics design of the Quartet Project provides unique  
448 “ground truth” for assessing the reliability of vertical integration. Here we  
449 included six horizontal integration methods for evaluation, *i.e.*, ratio-based  
450 scaling (Ratio), ComBat<sup>72</sup>, Harmony<sup>73</sup>, RUVg<sup>74</sup>, Z-score, and direct integration  
451 of the normalized values (Absolute). Five widely accepted vertical-integration  
452 tools were subsequently used, *i.e.*, SNF<sup>5</sup>, iClusterBayes<sup>75</sup>, MOFA+<sup>76</sup>, MClA<sup>77</sup>,  
453 and intNMF<sup>78</sup>, generating 30 combinations of horizontal and vertical integration  
454 for performance assessment.

455 The Adjusted Rand Index (ARI)<sup>79</sup> is a widely used QC metric to compare  
456 clustering results against external criteria. To quantitatively evaluate the  
457 reliability of vertical data integration at the multiomics level, we used ground  
458 truth-based ARI (daughter1-daughter2-father-mother, *i.e.*, D5-D6-F7-M8 as  
459 four independent sample groups or clusters) as the metric.

460 Ratio-based scaling data largely outperformed other horizontal-integration  
461 methods with a much higher ARI when the same vertical-integration algorithm  
462 was used (**Fig. 4c**). The final performance of integration was influenced by both  
463 horizontal-integration methods and vertical-integration algorithms. For example,  
464 regardless of which horizontal integration method was used, SNF performed  
465 better overall than intNMF in subsequent vertical integration. Furthermore, the  
466 multiomics-based sample similarity networks constructed based on the SNF  
467 clearly demonstrated the different power of correctly clustering the four Quartet  
468 sample groups by the six horizontal-integration methods (**Fig. 4d**). Integration  
469 using ratio-based profiling data showed tighter connections between objects  
470 with the same sample group (same color) and looser connections between  
471 objects from different groups. These results implicated that ratio-based scaling

472 improved the vertical integration of sample clusters through reliable cross-  
473 sectional integration.

474

475 **Quartet multiomics design provides genetics-driven ground truth for**  
476 **vertical data integration.** In addition to the relatively simple task of  
477 differentiating the four different individuals (daughter1-daughter2-father-mother,  
478 D5-D6-F7-M8), the Quartet monozygotic twin family design also provided a  
479 more challenging task of classifying these samples into the Quartet family-  
480 based and genetically distinct three groups (daughters-father-mother, D-F-M).  
481 Here we integrated the multiomics data of moderate quality (SNR in the range  
482 of top 20% to 80%) including DNA, methylation, miRNA, RNA, protein, and  
483 metabolite. For each vertical integration method, only one batch of data was  
484 selected for each omics type to prevent the influence of batch effect in  
485 horizontal integration. In addition, we conducted the Partitioning Around  
486 Medoids (PAM) clustering<sup>80</sup> for each type of single omics data and calculated  
487 ARI as a control to assist in assessing the performance of the vertical  
488 integration.

489 The inter-sample similarity networks built using data from a single omics  
490 (top) and integrated multiomics data using SNF, iClusterBayes, MOFA+, MCIA,  
491 and intNMF (bottom) were visualized in **Fig. 5a**. At the DNA level, identical twin  
492 samples (D5 and D6) were tightly clustered together due to their near-identical  
493 DNA sequences. On the other hand, they showed no clear tendency of  
494 clustering together for all five types of quantitative omics data (methylation,  
495 miRNA, RNA, protein, and metabolite), and may even look relatively far apart  
496 (e.g., D6 and F7 appeared closer in miRNA, RNA, or protein data). This  
497 distinction in clustering tendency between DNA variants and quantitative omics  
498 data implied that the classification task (D-F-M) can be used to assess whether  
499 a vertical integration approach can reveal the intrinsic built-in genetic truth in  
500 the Quartet identical twin family.

501 Vertical integration reduced technical noise and improved the ability of  
502 sample clustering, indicated by the fact that the ARIs of both three clusters (D-  
503 F-M) and four clusters (D5-D6-F7-M8) of multiomics integration were higher  
504 than the direct clustering of single-omics data (**Fig. 5b**). Nevertheless, there



505 were still differences in performance between the integration algorithms when  
506 distinguishing the three sample categories (D-F-M). SNF, iClusterBayes,  
507 MOFA+, and intNMF correctly classified these samples into three Quartet  
508 family-based groups (D-F-M), whereas MCIA did not perform well (**Fig. 5c**).  
509 This demonstrated that the integration algorithms could be prioritized by  
510 whether they found potential genetic truth (identical twins) behind the four  
511 individuals with distinct differences in molecular phenotypic data.

512 The similarity between identical twins (D5 and D6) during the vertical  
513 integration can be quantified to illustrate the impact of adding different layers of  
514 omics information on the clustering of Quartet samples (Methods for the details).  
515 As shown in **Fig. 5d**, the similarity between D5 and D6 decreased both when  
516 gradually adding downstream omics data starting from genomics, and when  
517 integrating upstream omics data starting from metabolomics (except for the  
518 eventual addition of DNA). This phenomenon again demonstrated that the  
519 genetic relationships between the Quartet identical twins were only reflected at  
520 the DNA level, and it also specified the need to incorporate genomic data when  
521 using the three clusters (D-F-M) as a QC metric for vertical integration.

522

523 **Best practice guidelines for QC and data integration of multiomics**  
524 **profiling using the Quartet reference materials.** QC is comprised of  
525 procedures to ensure the reliability of multiomics profiling using defined QC  
526 metrics and thresholds to meet the requirements of different research purposes.  
527 Large-scale multiomics studies involve multi-center and long-term  
528 measurements where unified QC metrics and universal integration strategies  
529 are needed to ensure quality during data generation and integration. We  
530 recommend including the Quartet reference materials (*e.g.*, four samples ×  
531 three replicates) when profiling each batch of study samples, and propose the  
532 best practice guidelines for QC and data integration in the three aspects  
533 including intra-batch data generation, horizontal integration, and vertical  
534 integration (**Table 2**).

535 We provided both reference dataset-free and reference dataset-based QC  
536 metrics to assess wet-lab proficiency of data generation for the same omics  
537 type in terms of the capability of identifying the subtle differences between

538 sample groups. Without relying on the reference datasets, the Quartet-based  
539 SNR (D5-D6-F7-M8) can be calculated for quality assessment for all types of  
540 omics data. The SNR calculated based on the four Quartet sample groups was  
541 more sensitive for assessing wet-lab proficiency than generic QC metrics based  
542 on multiple technical replicates of a single sample (**Fig. 1**). We also recommend  
543 the use of Mendelian concordance rate (MCR) based on the pedigree of the  
544 Quartet as a QC metric for assessing the quality of genomic data<sup>66</sup>. With the  
545 reference datasets, the wet-lab proficiency was assessed by the concordance  
546 between the evaluated batch of data and the reference datasets. Precision,  
547 recall, and F1-score were recommended for qualitative omics (small variants  
548 and structural variants), and RMSE at the ratio level (scaling to D6) of the  
549 feature expressions and the differential expressions between groups (D5/F7,  
550 F7/M8, and M8/D5) were recommended for quantitative omics (DNA  
551 methylation, transcriptomics, proteomics, and metabolomics). In addition, more  
552 comprehensive proficiency tests or inter-lab comparisons can be performed by  
553 obtaining the relative quality ranking among the cumulative datasets within the  
554 Quartet Data Portal<sup>71</sup>.

555 For horizontal integration of multi-batch data, a paradigm shift from  
556 “absolute” to “ratio”-based profiling by incorporating universal reference  
557 materials is essential and improves the reproducibility and batch-effect  
558 resistance. QC metrics used in intra-batch data generation can still be used in  
559 the quality assessment of horizontal integration. The reliability of further  
560 exploratory studies can be ensured as long as the horizontally integrated  
561 dataset can still distinguish different Quartet samples.

562 Vertical integration can be enhanced by ratio scaling the data based on  
563 reference materials. The Quartet multiomics and multi-sample reference  
564 materials provide two types of “built-in truth” for QC of vertical integration. The  
565 first type of “built-in truth” is based on the clustering of Quartet samples through  
566 the combined use of  $ARI_{D-F-M}$  and  $ARI_{D6-D6-F7-M8}$  to synthetically characterize the  
567 quality of vertical integration. In addition, the ability to correctly distinguish  
568 samples into four clusters (D5, D6, F7, and M8), as measured by  $ARI_{D6-D6-F7-M8}$ ,  
569 indicates that the integrated multiomics data must have the basic ability to  
570 differentiate the four different biological samples from technical replicates. On

571 the other hand, the integration algorithm must be able to identify the multiomics  
572 features driven by the built-in genetic truth of the Quartet identical twin, thus  
573 separating samples into three clusters (daughters D, father F, and mother M)  
574 by identifying true cross-omics associations. The second type of “built-in truth”  
575 is the hierarchical relationship across omics features following the principle of  
576 the central dogma. RMSE of cross-omics feature relationships calculated  
577 based on the reference datasets can be used to evaluate the accuracy of the  
578 cross-omics feature correlations.

## 579 Discussion

580 We developed the first suites of publicly available multiomics reference  
581 materials, including matched DNA, RNA, protein, and metabolite from  
582 immortalized B-lymphoblastoid cell lines of four individuals of a Chinese quartet  
583 family. We then extensively profiled these reference materials using diverse  
584 multiomics technology platforms in multiple labs across batches with repeated  
585 measurements. The reference datasets of measurands characterizing these  
586 reference materials at the genome scales were established based on a  
587 consensus approach using multiple bioinformatics pipelines and data  
588 integration approaches. The reference materials and the reference datasets  
589 can facilitate objective quality assessment of multiomics profiling (**Table 1**) by  
590 providing two types of “built-in truth” for QC of multiomics data generation and  
591 data integration. One is about the clustering of the Quartet samples based on  
592 their intrinsic biological differences, and the other is about the inherent  
593 relationships across omics features following the central dogma’s rule (DNA to  
594 RNA to protein). The resulting wealth of multiomics resources were made  
595 publicly available via the Quartet Data Portal ([chinese-quartet.org](http://chinese-quartet.org)).

596 Wet-lab proficiency was consistently found to be a more important factor  
597 affecting the quality of data generated for each omics type than the choice of a  
598 specific technology platform (**Fig. 2**). Our findings are consistent with what have  
599 been reported previously on gene-expression profiling with microarrays in  
600 MAQC-I<sup>55</sup> and with RNAseq in MAQC-III (SEQC)<sup>54</sup> when the same pair of  
601 MAQC reference RNA samples A (a mixture RNA of ten cancer cell lines) and  
602 B (a mixture RNA from brain tissues of 23 donors) were analyzed by a given  
603 platform in multiple labs. This observation seems intuitive; however, no  
604 adequate solution has been validated or adopted by the scientific community,  
605 hence has likely contributed to the lack of reproducibility of biomedical  
606 research<sup>81</sup>. Our observation highlights the urgency of highly sensitive  
607 proficiency testing to improve internal lab proficiency before profiling precious  
608 research and clinical samples. To this end, we established appropriate  
609 reference materials and proposed sensitive metrics for performance  
610 assessment.

611 The ability to correctly identify molecular phenotypic differences between  
612 various groups of samples or clinical subtypes of a disease is a fundamental  
613 requirement for any omics technology-based research. Thus, an appropriate  
614 performance metric should be taken into account and multiple groups of  
615 samples must be included to meet this vital requirement. For each omics type,  
616 the Quartet study design included four groups of samples (D5-D6-F7-M8),  
617 allowing us to define the universal Signal-to-Noise Ratio (SNR) metric for  
618 measuring the performance of any multiomics technologies. We found that the  
619 SNR metric was sensitive in identifying low-quality datasets that may otherwise  
620 be considered as of high quality. For example, reproducibility of repeated  
621 measurements (or technical replicates) of the same sample, usually expressed  
622 as coefficient of variation, Pearson correlation coefficient, or Jaccard index, is  
623 a widely used metric for identifying quality issues in transcriptomics, proteomics,  
624 and metabolomics data<sup>57, 62, 82</sup>. However, our study demonstrated the  
625 limitations of such single-sample based metrics. In particular, a high Pearson  
626 correlation coefficient between technical replicates from one single sample did  
627 not assure high quality in detecting the intrinsic biological differences between  
628 different groups of samples (**Extended Data Fig. 5**). Under such scenarios,  
629 unfortunately, the inter-sample differences between different groups of samples  
630 (*i.e.*, “signal”) and the intra-sample differences of technical replicates of the  
631 same sample (*i.e.*, “noise”) are at the same level, indicating that the  
632 measurement system does not have any differentiating ability. The Quartet  
633 multi-sample based reference materials suites and the SNR metric offer  
634 indispensable advantages for reliability assessment for each type of omics  
635 profiling.

636 Our results urge a paradigm shift from “absolute” to “ratio”-based profiling  
637 by incorporating universal reference materials in designing and executing a  
638 multiomics study. A striking finding of our study is that the multiomics profiling  
639 data at the “absolute” level, such as FPKM in transcriptomics, FOT (fraction of  
640 total) in MS-based proteomics, and relative peak areas in metabolomics from a  
641 single sample, is inherently irreproducible across platforms, labs, or batches,  
642 leading to the notorious “batch effects”. Such batch effects, usually confounded  
643 with study factors of interests, hinder the discovery of reliable biomarkers either  
644 by mistaking batch differences as biological signals or by attenuating biological

645 signals with the incorrect use of “batch-effect correction” methods (see details  
646 in an accompanying paper<sup>70</sup>). The presence of batch effects makes the  
647 horizontal integration of diverse datasets from the same omics type impossible,  
648 as can be seen from the lack of capability of correctly clustering the Quartet  
649 samples (**Fig. 3a** top). Convincingly, by converting absolute profiling data of  
650 study samples to ratio scales relative to those of the same reference material  
651 (such as D6), the resulting ratio-based profiling data (such as D5/D6) were  
652 comparable across different protocols, instruments, labs, or batches (**Fig. 3a**  
653 bottom), and therefore were defined as the quantitative reference datasets  
654 (**Extended Data Fig. 4**).

655 The large differences in reproducibility between absolute- and ratio-based  
656 profiling data can be explained, at least partially, by the fundamental principles  
657 and assumptions behind data representation of omics measurements. The  
658 concentration or abundance of an analyte ( $C$ ) in a sample is important to  
659 biomedical research and what a measurement technology intends to provide.  
660 In quantitative omics profiling, the “absolute” instrument readout or intensity ( $I$ ,  
661 e.g., FPKM, FOT, or peak area, whether per sample scaling or normalization is  
662 applied or not) is usually used as a surrogate of  $C$  by assuming that there is a  
663 linear and fixed relationship ( $f$ , or sensitivity) between  $I$  and  $C$  under any  
664 experimental conditions<sup>83</sup>,  $I=f(C)$ . In reality, however, the relationship  $f$  can vary  
665 due to the differences in platform details, reagent lots, lab conditions, or  
666 operator biases, among other experimental factors, making  $I$  inherently  
667 irreproducible between batches. On the contrary, when a common reference  
668 sample ( $r$ ) is analyzed in parallel with study samples in the same experiment  
669 (batch) as a control, the resulting ratio of  $I^s / I^r$  from each batch will remain  
670 reproducible and accurately reflect the ratio of  $C^s / C^r$ . It is because the intensity  
671  $I$  for the reference and study samples can be represented as  $I_1=f_1(C^r)$  and  
672  $I_1^s=f_1(C^s)$  for batch 1 and  $I_2=f_2(C^r)$  and  $I_2^s=f_2(C^s)$  for batch 2, respectively. Note  
673 that  $f$  remains fixed or comparable for both the reference and study samples  
674 being analyzed under the same experiment (batch). Thus, when we divide the  
675 intensity  $I$  of the study sample by that of the reference sample in the same batch,  
676 the resulting ratio,  $I_1^s / I_1$  for batch 1 and  $I_2^s / I_2$  for batch 2, will remain the same  
677 and equal to  $C^s / C^r$ , a constant of biological significance. In fact, the lack of  
678 reproducibility of absolute gene-expression data in microarray<sup>55, 84</sup>, RNAseq<sup>54</sup>,

679 or miRNAseq<sup>82</sup> across batches or platforms have been widely documented, as  
680 is the increased reproducibility at the ratio scale<sup>54, 55, 83</sup>. Ironically, mainstream  
681 practices still represent omics profiling data in absolute scale, presumably due  
682 to the lack of readily accessible reference materials as controls, leading to  
683 numerous challenges in integrating diverse datasets generated under various  
684 experimental conditions. It is gratifying to note that the Olink proteomics  
685 platform reports profiling data in ratio scales relative to its control samples  
686 ([www.olink.com/](http://www.olink.com/)).

687 Multiomics profiling is an integrated process, and performance validation  
688 should be conducted in the entire sample-to-result process. We observed that  
689 each component of the data generation and data integration procedures can  
690 affect the final results of multiomics profiling. For each type of omics data  
691 generation, a full performance validation and proficiency testing should be  
692 conducted to assess whether the measurement can identify the inherent  
693 biological differences between various sample groups, a fundamental goal of  
694 multiomics profiling. Previous studies mainly focused on performance validation  
695 of new technologies<sup>52, 60</sup>, but our study revealed that horizontal and vertical data  
696 integration across technologies should also be assessed using ground-truth  
697 based objective QC metrics. The multiomics design of the Quartet Project  
698 allowed us to demonstrate the advantages of multiomics profiling over any  
699 single omics type and to objectively evaluate the pros and cons of various data  
700 integration methods in terms of clustering samples according to built-in  
701 between-group differences and identifying reliable features with cross-omics  
702 relationships obeying the central dogma rule. The Quartet Project established  
703 a novel framework for developing multiomics reference materials, reference  
704 datasets, and QC methods for multiomics studies along with the best practice  
705 guidelines for QC and data integration of multiomics profiling (**Table 2**).

706 Several limitations and caveats of our study should be pointed out. First,  
707 the number of analytes (*e.g.*, mRNAs or proteins) expressed in the Quartet  
708 reference materials is limited. Each Quartet reference material was derived  
709 from a single B-lymphoblastoid cell line, thus genes or proteins not expressed  
710 in the B-lymphoblastoid cell line are not expected to be detectable in the Quartet  
711 reference materials. This is not a serious problem when the purpose is to use

712 the Quartet reference materials for proficiency testing or internal optimization  
713 of technology platforms or training of lab technicians. However, this could  
714 become a limitation when the Quartet reference materials are to be used as  
715 controls and profiled along with study samples for reporting ratio-based profiling  
716 data, because the denominator for the non-detectable features would become  
717 zeros. In this case, a fudge factor or flooring value can be added to make the  
718 division possible. Secondly, the number of analytes with well-defined reference  
719 values of differential expression (ratio) between sample pairs is also limited,  
720 because only ratio values large enough are reproducibly detectable. Thirdly,  
721 although the stability of DNA is commonly accepted and the stability of MAQC  
722 reference RNA samples has demonstrated for at least 17 years (unpublished  
723 data), the long-term stability of the Quartet protein and metabolite reference  
724 materials needs to be monitored in terms of both the stability of individual  
725 analytes and the stability of the ratio-based reference values. Finally, as is true  
726 for any reference materials, the replication of the Quartet multiomics reference  
727 materials will require the recalibration of the reference datasets, and batch-to-  
728 batch differences in the production and characterization of the reference  
729 materials need to be carefully recorded and reported, such as potential genetic  
730 drifts and variability in quantitative omics features at the RNA, protein, and  
731 metabolite levels due to cell culturing.

732 In summary, the Chinese Quartet Project provides the international  
733 community with rich multiomics resources, which can serve as a reference for  
734 the research community to evaluate new technologies, labs, assays, products,  
735 lab operators, and computational algorithms. Large-scale multiomics studies  
736 usually involve complex multi-center and long-term measurements. To ensure  
737 the reliability of scientific research results, we highly recommend the use of  
738 unified Quartet reference materials or equivalents during generation, analysis,  
739 and integration of heterogeneous datasets. In particular, the ratio-based  
740 paradigm-shift approach using common references as side-by-side controls,  
741 when widely adopted, can fundamentally advance the integration of diverse  
742 multiomics datasets from research and the clinic by making them inherently  
743 reproducible and batch-effect resistant, hence increasing the chance of  
744 discovering reliable biomarkers for realizing precision medicine.



## 745 **References**

- 746 1. Hasin, Y., Seldin, M. & Lusis, A. Multi-omics approaches to disease. *Genome Biol.*  
747 **18**, 83 (2017).
- 748 2. Karczewski, K.J. & Snyder, M.P. Integrative omics for health and disease. *Nat.*  
749 *Rev. Genet.* **19**, 299-310 (2018).
- 750 3. Shilo, S., Rossman, H. & Segal, E. Axes of a revolution: challenges and promises  
751 of big data in healthcare. *Nat. Med.* **26**, 29-38 (2020).
- 752 4. Ideker, T., Galitski, T. & Hood, L. A new approach to decoding life: systems biology.  
753 *Annu. Rev. Genom. Hum. Genet.* **2**, 343-372 (2001).
- 754 5. Wang, B. et al. Similarity network fusion for aggregating data types on a genomic  
755 scale. *Nat. Methods* **11**, 333-337 (2014).
- 756 6. Yan, J., Risacher, S.L., Shen, L. & Saykin, A.J. Network approaches to systems  
757 biology analysis of complex disease: integrative methods for multi-omics data.  
758 *Brief. Bioinform.* **19**, 1370-1381 (2018).
- 759 7. Hawe, J.S., Theis, F.J. & Heinig, M. Inferring interaction networks from multi-omics  
760 data. *Front. Genet.* **10**, 535 (2019).
- 761 8. Yurkovich, J.T., Tian, Q., Price, N.D. & Hood, L. A systems approach to clinical  
762 oncology uses deep phenotyping to deliver personalized care. *Nat. Rev. Clin.*  
763 *Oncol.* **17**, 183-194 (2020).
- 764 9. Chang, K. et al. The Cancer Genome Atlas Pan-Cancer analysis project. *Nat.*  
765 *Genet.* **45**, 1113-1120 (2013).
- 766 10. Bycroft, C. et al. The UK Biobank resource with deep phenotyping and genomic  
767 data. *Nature* **562**, 203-209 (2018).
- 768 11. Campbell, P.J. et al. Pan-cancer analysis of whole genomes. *Nature* **578**, 82-93  
769 (2020).
- 770 12. Denny, J.C. & Collins, F.S. Precision medicine in 2030-seven ways to transform  
771 healthcare. *Cell* **184**, 1415-1419 (2021).
- 772 13. Jin, L. Welcome to the Phenomics Journal. *Phenomics* **1**, 1-2 (2021).
- 773 14. Veturi, Y. et al. A unified framework identifies new links between plasma lipids and  
774 diseases from electronic medical records across large-scale cohorts. *Nat. Genet.*  
775 **53**, 972-981 (2021).
- 776 15. Tarazona, S., Arzalluz-Luque, A. & Conesa, A. Undisclosed, unmet and neglected  
777 challenges in multi-omics studies. *Nat. Comput. Sci.* **1**, 395-402 (2021).
- 778 16. Burk, R.D. et al. Integrated genomic and molecular characterization of cervical  
779 cancer. *Nature* **543**, 378-384 (2017).
- 780 17. Jiang, Y.Z. et al. Genomic and transcriptomic landscape of triple-negative breast  
781 cancers: subtypes and treatment strategies. *Cancer Cell* **35**, 428-440.e425 (2019).
- 782 18. Zimmer, A. et al. The geometry of clinical labs and wellness states from deeply  
783 phenotyped humans. *Nat. Commun.* **12**, 3578 (2021).
- 784 19. Menyhárt, O. & Györfy, B. Multi-omics approaches in cancer research with  
785 applications in tumor subtyping, prognosis, and diagnosis. *Comput. Struct.*  
786 *Biotechnol. J.* **19**, 949-960 (2021).

- 787 20. Zhou, W. et al. Longitudinal multi-omics of host–microbe dynamics in prediabetes.  
788 *Nature* **569**, 663-671 (2019).
- 789 21. Contrepois, K. et al. Molecular choreography of acute exercise. *Cell* **181**, 1112-  
790 1130.e1116 (2020).
- 791 22. Li, Y. et al. Using composite phenotypes to reveal hidden physiological  
792 heterogeneity in high-altitude acclimatization in a Chinese Han Longitudinal Cohort.  
793 *Phenomix* **1**, 3-14 (2021).
- 794 23. Lehmann, B.D. et al. Multi-omics analysis identifies therapeutic vulnerabilities in  
795 triple-negative breast cancer subtypes. *Nat. Commun.* **12**, 6276 (2021).
- 796 24. Schulte-Sasse, R., Budach, S., Hnisz, D. & Marsico, A. Integration of multiomics  
797 data with graph convolutional networks to identify new cancer genes and their  
798 associated molecular mechanisms. *Nat. Mach. Intell.* **3**, 513-526 (2021).
- 799 25. Silverbush, D. et al. Simultaneous integration of multi-omics data improves the  
800 identification of cancer driver modules. *Cell Syst.* **8**, 456-466.e455 (2019).
- 801 26. Price, N.D. et al. A wellness study of 108 individuals using personal, dense,  
802 dynamic data clouds. *Nat. Biotechnol.* **35**, 747-756 (2017).
- 803 27. Tebani, A. et al. Integration of molecular profiles in a longitudinal wellness profiling  
804 cohort. *Nat. Commun.* **11**, 4487 (2020).
- 805 28. Wilmanski, T. et al. Blood metabolome predicts gut microbiome  $\alpha$ -diversity in  
806 humans. *Nat. Biotechnol.* **37**, 1217-1228 (2019).
- 807 29. Dodig-Crnković, T. et al. Facets of individual-specific health signatures determined  
808 from longitudinal plasma proteome profiling. *EBioMedicine* **57**, 102854 (2020).
- 809 30. Leiserson, M.D.M. et al. Pan-cancer network analysis identifies combinations of  
810 rare somatic mutations across pathways and protein complexes. *Nat. Genet.* **47**,  
811 106-114 (2015).
- 812 31. Schüssler-Fiorenza Rose, S.M. et al. A longitudinal big data approach for precision  
813 health. *Nat. Med.* **25**, 792-804 (2019).
- 814 32. Tarazona, S. et al. Harmonization of quality metrics and power calculation in multi-  
815 omic studies. *Nat. Commun.* **11**, 3092 (2020).
- 816 33. Palsson, B. & Zengler, K. The challenges of integrating multi-omic data sets. *Nat.*  
817 *Chem. Biol.* **6**, 787-789 (2010).
- 818 34. Argelaguet, R., Cuomo, A.S.E., Stegle, O. & Marioni, J.C. Computational principles  
819 and challenges in single-cell data integration. *Nat. Biotechnol.* **39**, 1202-1215  
820 (2021).
- 821 35. Leek, J.T. et al. Tackling the widespread and critical impact of batch effects in high-  
822 throughput data. *Nat. Rev. Genet.* **11**, 733-739 (2010).
- 823 36. Goh, W.W.B., Wang, W. & Wong, L. Why batch effects matter in omics data, and  
824 how to avoid them. *Trends Biotechnol.* **35**, 498-507 (2017).
- 825 37. Zhou, L., Chi-Hau Sue, A. & Bin Goh, W.W. Examining the practical limits of batch  
826 effect-correction algorithms: When should you care about batch effects? *J. Genet.*  
827 *Genomics* **46**, 433-443 (2019).
- 828 38. Luecken, M.D. et al. Benchmarking atlas-level data integration in single-cell  
829 genomics. *Nat. Methods* **19**, 41-50 (2022).

- 830 39. Tran, H.T.N. et al. A benchmark of batch-effect correction methods for single-cell  
831 RNA sequencing data. *Genome Biol.* **21**, 12 (2020).
- 832 40. Misra, B.B., Langefeld, C.D., Olivier, M. & Cox, L.A. Integrated omics: tools,  
833 advances and future approaches. *J. Mol. Endocrinol.* (2018).
- 834 41. Krassowski, M., Das, V., Sahu, S.K. & Misra, B.B. State of the field in multi-omics  
835 research: From computational needs to data mining and sharing. *Front. Genet.* **11**  
836 (2020).
- 837 42. Cantini, L. et al. Benchmarking joint multi-omics dimensionality reduction  
838 approaches for the study of cancer. *Nat. Commun.* **12**, 124 (2021).
- 839 43. Rappoport, N. & Shamir, R. Multi-omic and multi-view clustering algorithms: review  
840 and cancer benchmark. *Nucleic Acids Res.* **47**, 1044 (2019).
- 841 44. Choobdar, S. et al. Assessment of network module identification across complex  
842 diseases. *Nat. Methods* **16**, 843-852 (2019).
- 843 45. Sené, M., Gilmore, I. & Janssen, J.T. Metrology is key to reproducing results.  
844 *Nature* **547**, 397-399 (2017).
- 845 46. Hardwick, S.A., Deveson, I.W. & Mercer, T.R. Reference standards for next-  
846 generation sequencing. *Nat. Rev. Genet.* **18**, 473-484 (2017).
- 847 47. Salit, M. & Woodcock, J. MAQC and the era of genomic medicine. *Nat. Biotechnol.*  
848 **39**, 1066-1067 (2021).
- 849 48. Choquette, S.J., Duester, D.L. & Sharpless, K.E. NIST reference materials: utility  
850 and future. *Annu. Rev. Anal. Chem.* **13**, 453-474 (2020).
- 851 49. Zook, J.M. et al. An open resource for accurately benchmarking small variant and  
852 reference calls. *Nat. Biotechnol.* **37**, 561-566 (2019).
- 853 50. Zook, J.M. et al. A robust benchmark for detection of germline large deletions and  
854 insertions. *Nat. Biotechnol.* **38**, 1347-1355 (2020).
- 855 51. Jones, W. et al. A verified genomic reference sample for assessing performance  
856 of cancer panels detecting small variants of low allele frequency. *Genome Biol.* **22**,  
857 111 (2021).
- 858 52. Deveson, I.W. et al. Evaluating the analytical validity of circulating tumor DNA  
859 sequencing assays for precision oncology. *Nat. Biotechnol.* (2021).
- 860 53. Fang, L.T. et al. Establishing community reference samples, data and call sets for  
861 benchmarking cancer mutation detection using whole-genome sequencing. *Nat.*  
862 *Biotechnol.* **39**, 1151-1160 (2021).
- 863 54. Su, Z. et al. A comprehensive assessment of RNA-seq accuracy, reproducibility  
864 and information content by the Sequencing Quality Control Consortium. *Nat.*  
865 *Biotechnol.* **32**, 903-914 (2014).
- 866 55. Shi, L. et al. The MicroArray Quality Control (MAQC) project shows inter- and  
867 intraplatform reproducibility of gene expression measurements. *Nat. Biotechnol.*  
868 **24**, 1151-1161 (2006).
- 869 56. Friedman, D.B. et al. The ABRF Proteomics Research Group studies: educational  
870 exercises for qualitative and quantitative proteomic analyses. *Proteomics* **11**,  
871 1371-1381 (2011).

- 872 57. Ulmer, C.Z. et al. LipidQC: method validation tool for visual comparison to SRM  
873 1950 using NIST interlaboratory comparison exercise lipid consensus mean  
874 estimate values. *Anal. Chem.* **89**, 13069-13073 (2017).
- 875 58. Krusche, P. et al. Best practices for benchmarking germline small-variant calls in  
876 human genomes. *Nat. Biotechnol.* **37**, 555-560 (2019).
- 877 59. Matthijs, G. et al. Guidelines for diagnostic next-generation sequencing. *Eur. J.*  
878 *Hum. Genet.* **24**, 1515 (2016).
- 879 60. Gargis, A.S. et al. Assuring the quality of next-generation sequencing in clinical  
880 laboratory practice. *Nat. Biotechnol.* **30**, 1033-1036 (2012).
- 881 61. Broadhurst, D. et al. Guidelines and considerations for the use of system suitability  
882 and quality control samples in mass spectrometry assays applied in untargeted  
883 clinical metabolomic studies. *Metabolomics* **14**, 72 (2018).
- 884 62. Collins, B.C. et al. Multi-laboratory assessment of reproducibility, qualitative and  
885 quantitative performance of SWATH-mass spectrometry. *Nat. Commun.* **8**, 291  
886 (2017).
- 887 63. Beger, R.D. et al. Towards quality assurance and quality control in untargeted  
888 metabolomics studies. *Metabolomics* **15** (2019).
- 889 64. Wang, X. et al. QC metrics from CPTAC raw LC-MS/MS data interpreted through  
890 multivariate statistics. *Anal. Chem.* **86**, 2497-2509 (2014).
- 891 65. Chen, X.D., Jiang, Y.F., Xu, P. & Jin, L. Construction and utilization of human  
892 genetic resources in large population cohorts. *Yi Chuan* **43**, 980-987 (2021).
- 893 66. Ren, L. et al. Quartet DNA reference materials and datasets for comprehensively  
894 evaluating germline variants calling performance. *bioRxiv*,  
895 <https://doi.org/10.1101/2022.09.28.509844> (2022).
- 896 67. Yu, Y. et al. Quartet RNA reference materials and ratio-based reference datasets  
897 for reliable transcriptomic profiling. *bioRxiv*,  
898 <https://doi.org/10.1101/2022.09.26.507265> (2022).
- 899 68. Tian, S. et al. Quartet protein reference materials and datasets for multi-platform  
900 assessment of label-free proteomics [Unpublished manuscript]. (2022).
- 901 69. Zhang, N. et al. Quartet metabolite reference materials and datasets for inter-  
902 laboratory reliability assessment of metabolomics studies [Unpublished  
903 manuscript]. (2022).
- 904 70. Yu, Y. et al. Correcting batch effects in large-scale multiomic studies using a  
905 reference-material-based ratio method. *bioRxiv*,  
906 <https://doi.org/10.1101/2022.10.19.507549> (2022).
- 907 71. Yang, J. et al. The Quartet Data Portal: integration of community-wide resources  
908 for multiomics quality control. *bioRxiv*, <https://doi.org/10.1101/2022.09.26.507202>  
909 (2022).
- 910 72. Zhang, Y., Parmigiani, G. & Johnson, W.E. ComBat-seq: batch effect adjustment  
911 for RNA-seq count data. *NAR Genom. Bioinform.* **2** (2020).
- 912 73. Korsunsky, I. et al. Fast, sensitive and accurate integration of single-cell data with  
913 Harmony. *Nat. Methods* **16**, 1289-1296 (2019).

- 914 74. Risso, D., Ngai, J., Speed, T.P. & Dudoit, S. Normalization of RNA-seq data using  
915 factor analysis of control genes or samples. *Nat. Biotechnol.* **32**, 896-902 (2014).
- 916 75. Mo, Q. et al. A fully Bayesian latent variable model for integrative clustering  
917 analysis of multi-type omics data. *Biostatistics* **19**, 71-86 (2017).
- 918 76. Argelaguet, R. et al. MOFA+: a statistical framework for comprehensive integration  
919 of multi-modal single-cell data. *Genome Biol.* **21**, 111 (2020).
- 920 77. Meng, C., Kuster, B., Culhane, A.C. & Gholami, A.M. A multivariate approach to  
921 the integration of multi-omics datasets. *BMC Bioinform.* **15**, 162 (2014).
- 922 78. Chalise, P. & Fridley, B.L. Integrative clustering of multi-level 'omic data based on  
923 non-negative matrix factorization algorithm. *PLoS One* **12**, e0176278 (2017).
- 924 79. Hubert, L. & Arabie, P. Comparing partitions. *J Classif.* **2**, 193-218 (1985).
- 925 80. Schubert, E. & Rousseeuw, P.J. Fast and eager k-medoids clustering: O (k)  
926 runtime improvement of the PAM, CLARA, and CLARANS algorithms. *Information*  
927 *Systems* **101**, 101804 (2021).
- 928 81. Baker, M. 1,500 scientists lift the lid on reproducibility. *Nature* **533**, 452-454 (2016).
- 929 82. Giraldez, M.D. et al. Comprehensive multi-center assessment of small RNA-seq  
930 methods for quantitative miRNA profiling. *Nat. Biotechnol.* **36**, 746-757 (2018).
- 931 83. Shi, L. et al. Microarray scanner calibration curves: characteristics and implications.  
932 *BMC Bioinform.* **6**, S11 (2005).
- 933 84. Chen, J.J., Hsueh, H.-M., Delongchamp, R.R., Lin, C.-J. & Tsai, C.-A.  
934 Reproducibility of microarray data: a further analysis of microarray quality control  
935 (MAQC) data. *BMC Bioinform.* **8**, 412 (2007).
- 936
- 937

938 **Figures**

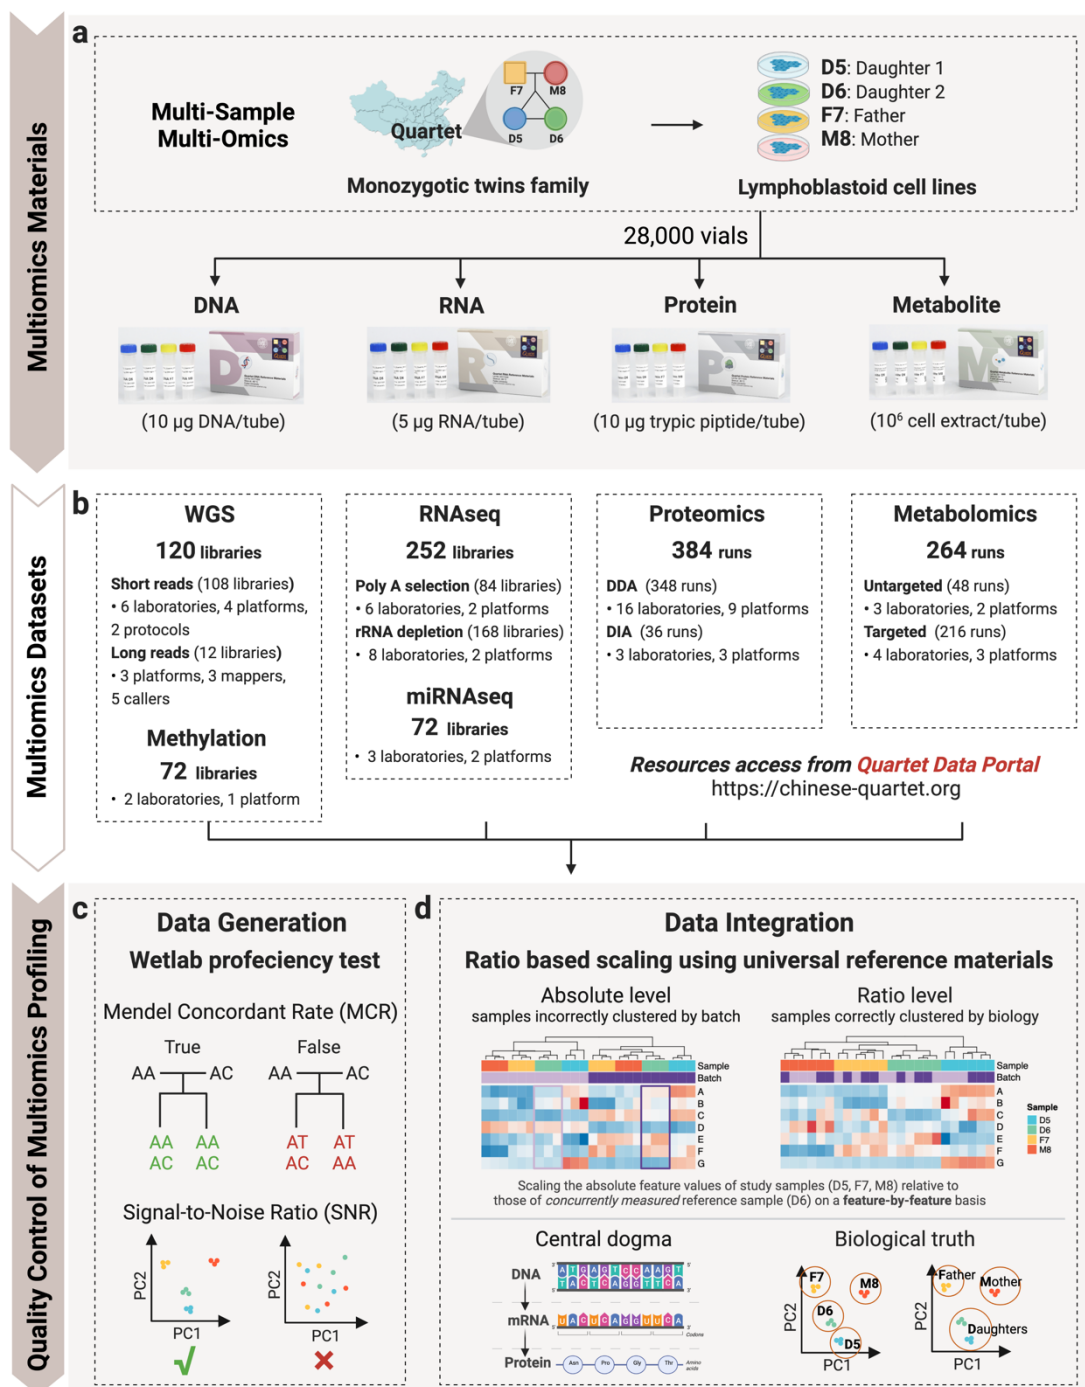

939

940 **Fig. 1 | Overview of the Quartet Project.**

941 **a**, Design and production of Quartet family-based multiomics reference material  
 942 suites. **b**, Data generation across multiple platforms, labs, batches, and omics  
 943 types. **c**, Wet-lab proficiency test for the generation of each type of omic data  
 944 using Quartet multi-sample-based reference materials. **d**, Ratio-based scaling

945 using universal reference materials empower within- (horizontal) and cross-  
946 omics (vertical) data integration. Two types of QC metrics for multiomics data  
947 integration are developed: the cross-omics feature relationships that follow the  
948 central dogma, and the ability to classify samples into either four phenotypically  
949 different groups (D5-D6-F7-M8) or genetically driven three clusters (Daughters-  
950 Father-Mother).

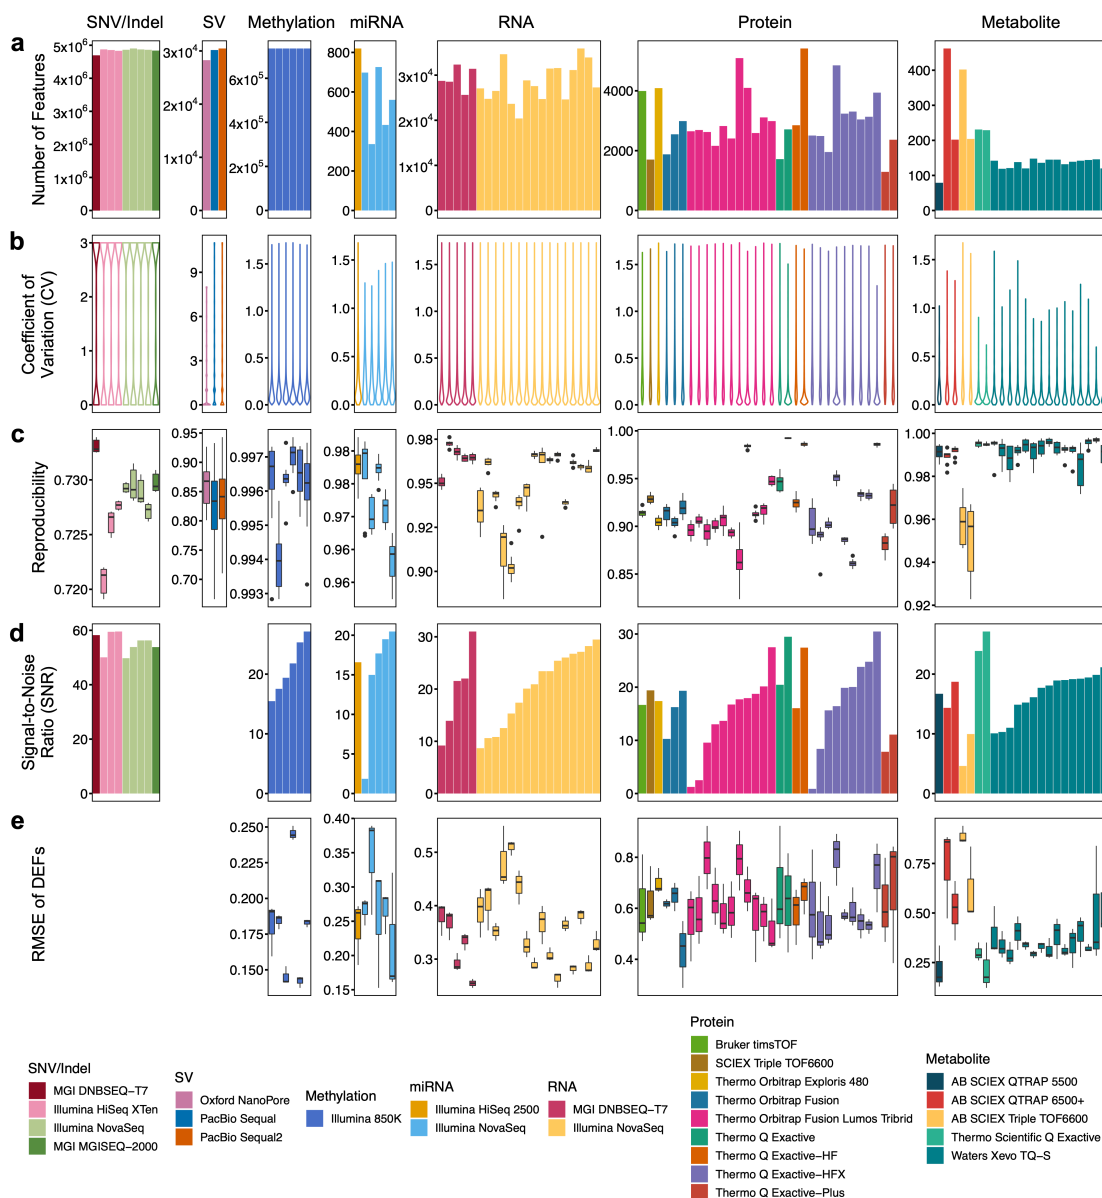

951

952 **Fig. 2 | Wet-lab proficiency diverges in multiomics data generation.**

953 **a**, The number of features detected from each dataset generated in different  
 954 labs using different platforms. **b**, Distribution of the number of experiments  
 955 supporting genomic variant calling, or coefficient of variation (CV) in quantitative  
 956 omic profiling from technical replicates (analytical repeats in SV calling, and  
 957 library repeats for the others) within a batch. **c**, Technical reproducibility from  
 958 three replicates within a batch, calculated as the Jaccard index for genomic  
 959 variant calling and Pearson correlation coefficient ( $r$ ) for quantitative omic  
 960 profiling. **d**, Signal-to-Noise Ratio (SNR) based on Quartet multi-sample design  
 961 (4 samples  $\times$  3 replicates per batch). **e**, Root Mean Square Error (RMSE) of  
 962 high confidence differentially expressed features (DEFs).



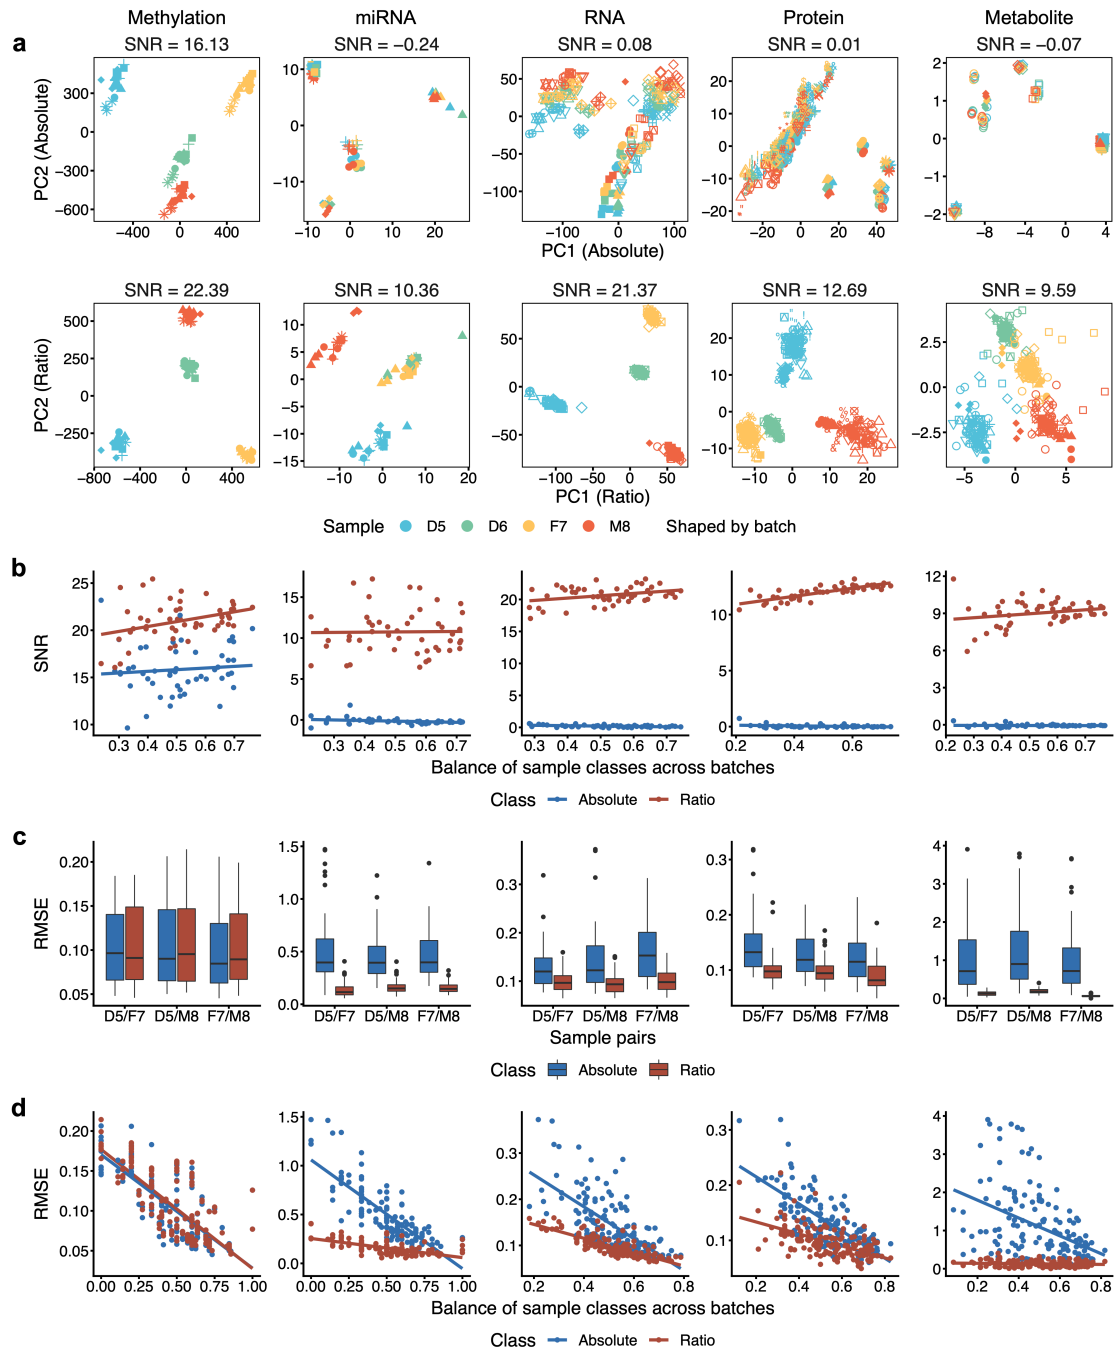

963

964 **Fig. 3 | Ratio-based scaling enables horizontal integration of datasets**  
 965 **across batches, labs, and platforms.**

966 **a**, PCA plots of horizontal integration of all batches of methylation, miRNAseq,  
 967 RNAseq, proteomics, and metabolomics datasets at absolute level (raw data,  
 968 top row) and ratio level (ratio scaling to D6 sample, bottom row). **b**, Scatter plots  
 969 between SNR and degree of sample class-batch balance. Blue: absolute level;  
 970 Red: ratio level. **c**, Boxplots of RMSE of the DEFs of horizontal integration data

971 at absolute level (Blue) and ratio level (Red) based on the reference datasets.  
972 **d**, Scatter plots between RMSE when integrating at absolute (Blue) and ratio  
973 (Red) levels and the degrees of sample class-batch balance.

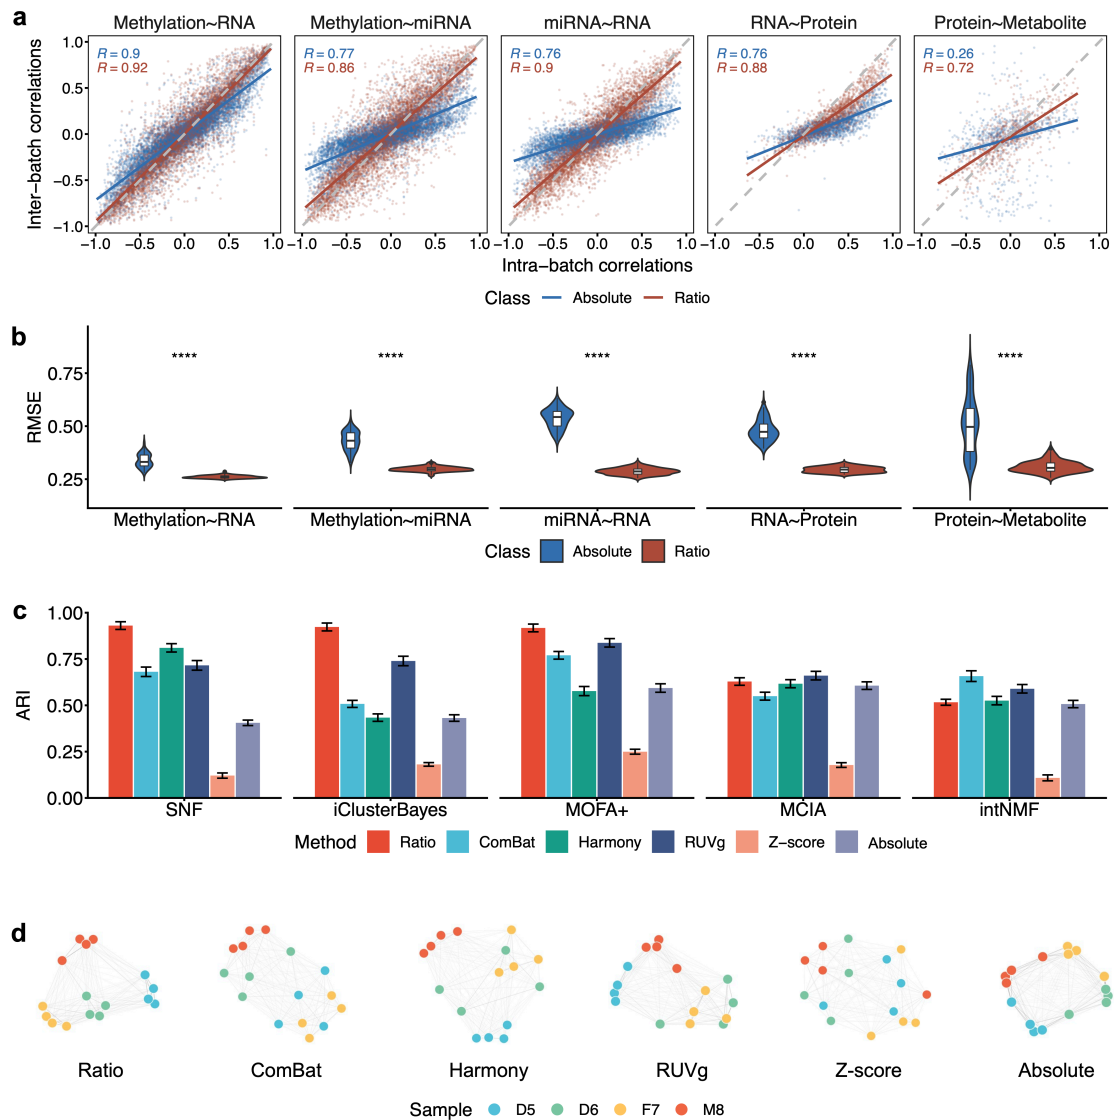

974

975 **Fig. 4 | Ratio-based scaling facilitates vertical integration of datasets from**  
 976 **different omics types.**

977 **a**, Scatter plots between cross-omics feature relationships of intra- and inter-  
 978 batch (horizontally integrated) data at absolute level (Blue) and ratio level (Red).  
 979 The solid lines represent fitted curves from linear regression along with the  
 980 Pearson correlation coefficients. **b**, Violin plots of RMSE of cross-omics feature  
 981 relationships of horizontal integration data at absolute level (Blue) and ratio  
 982 level (Red) based on the reference datasets. **c**, Bar plots of the Adjusted Rand  
 983 Index (ARI) of vertically integrated multiomics datasets of multiple batches  
 984 using different algorithms including SNF, iClusterBayes, MOFA+, MCIA, and  
 985 intNMF. Data of each omics type were preprocessed by Ratio, ComBat,  
 986 Harmony, RUVg, Z-score, or Absolute (no further processing on the normalized

987 datasets) for horizontal integration. **d**, Sample similarity networks for SNF  
988 integration with different data preprocessing methods in **c**.

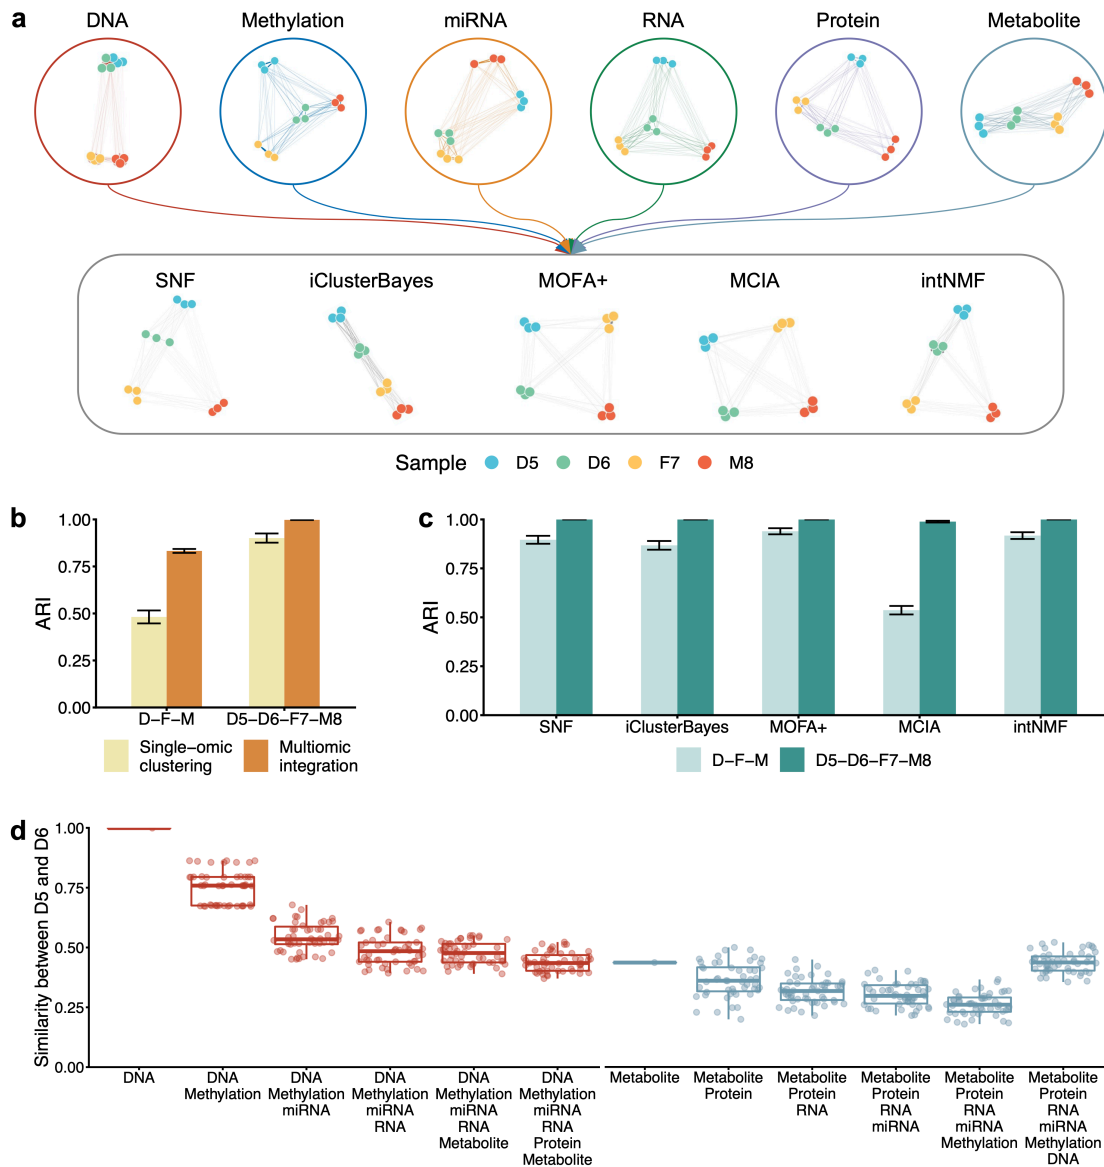

989

990 **Fig. 5 | Quartet multiomics design provides genetics-driven ground truth**  
 991 **for vertical integration.**

992 **a**, Networks of six types of omics based on the similarity between 12 samples  
 993 within one batch (top row), and sample similarity networks obtained by SNF,  
 994 iClusterBayes, MOFA+, MCIA, and intNMF (bottom row) that integrated the six  
 995 types of multiomics data. **b**, Bar plots of the ARIs when clustering samples into  
 996 three (D-F-M) or four groups (D5-D6-F7-M8) by single-omic (Light yellow)  
 997 versus multiomics integration (Dark yellow) using PAM clustering algorithms. **c**,  
 998 Bar plots of the ARIs of multiomics data integration using SNF, iClusterBayes,  
 999 MOFA+, MCIA, and intNMF. Light green represents data when the true labels  
 1000 of the samples were set to three clusters (D-F-M), and dark green represents

1001 four clusters (D5-D6-F7-M8). **d**, Box plots of the ARIs for integration of different  
1002 types of omic data. The multiomics data were integrated started from DNA  
1003 (Red), and metabolite (Grey) by using SNF.

## Tables

| Table 1   Summary of Quartet multiomics reference materials |                                    |                                 |                       |                 |                     |                                                                                                                              |                                                       |                  |
|-------------------------------------------------------------|------------------------------------|---------------------------------|-----------------------|-----------------|---------------------|------------------------------------------------------------------------------------------------------------------------------|-------------------------------------------------------|------------------|
| Type                                                        | Reference Material ID              | Certified Reference Material ID | Amount                | Cell Collection | Material Extraction | Description                                                                                                                  | User Scenarios                                        | Quantity (Vials) |
| DNA                                                         | FDU_Quartet_DNA_D5_20160806        | GBW09900                        | 10 µg                 | 20160806        | 20160819            | 220 ng/µL, 50 µL/tube in TE solution. DNA integrity number (DIN) > 8.5, with the peak size > 60,000 bp.                      | Short-read and long-read sequencing, microarray, PCR. | 1000 each        |
|                                                             | FDU_Quartet_DNA_D6_20160806        | GBW09901                        |                       |                 |                     |                                                                                                                              |                                                       |                  |
|                                                             | FDU_Quartet_DNA_F7_20160806        | GBW09902                        |                       |                 |                     |                                                                                                                              |                                                       |                  |
|                                                             | FDU_Quartet_DNA_M8_20160806        | GBW09903                        |                       |                 |                     |                                                                                                                              |                                                       |                  |
|                                                             | FDU_Quartet_DNA_D5_20171028        | /                               | 10 µg                 | 20171028        | 20171207            | 220 ng/µL, 50 µL/tube in TE solution. DNA integrity number (DIN) > 8.5, with the peak size > 60,000 bp.                      | Short-read and long-read sequencing, microarray, PCR. | 1000 each        |
|                                                             | FDU_Quartet_DNA_D6_20171028        | /                               |                       |                 |                     |                                                                                                                              |                                                       |                  |
|                                                             | FDU_Quartet_DNA_F7_20171028        | /                               |                       |                 |                     |                                                                                                                              |                                                       |                  |
|                                                             | FDU_Quartet_DNA_M8_20171028        | /                               |                       |                 |                     |                                                                                                                              |                                                       |                  |
| RNA                                                         | FDU_Quartet_RNA_D5_20171028        | GBW09904                        | 5 µg                  | 20171028        | 20180725            | 520 ng/µL, 10 µL/tube in water solution. RNA integrity number (RIN) > 8.5. miRNA and other small RNA are retained.           | RNA profiling, small RNA profiling.                   | 1000 each        |
|                                                             | FDU_Quartet_RNA_D6_20171028        | GBW09905                        |                       |                 |                     |                                                                                                                              |                                                       |                  |
|                                                             | FDU_Quartet_RNA_F7_20171028        | GBW09906                        |                       |                 |                     |                                                                                                                              |                                                       |                  |
|                                                             | FDU_Quartet_RNA_M8_20171028        | GBW09907                        |                       |                 |                     |                                                                                                                              |                                                       |                  |
| Protein                                                     | FDU_Quartet_Pipetide_D5_20171028   | /                               | 10 µg                 | 20171028        | 20171106            | Dried, tryptic peptide mixtures.                                                                                             | Label-free LC-MS/MS-based proteomics.                 | 1000 each        |
|                                                             | FDU_Quartet_Pipetide_D6_20171028   | /                               |                       |                 |                     |                                                                                                                              |                                                       |                  |
|                                                             | FDU_Quartet_Pipetide_F7_20171028   | /                               |                       |                 |                     |                                                                                                                              |                                                       |                  |
|                                                             | FDU_Quartet_Pipetide_M8_20171028   | /                               |                       |                 |                     |                                                                                                                              |                                                       |                  |
|                                                             | FDU_Quartet_Pipetide_D5_20171028   | /                               | 10 µg                 | 20171028        | 20200616            | Dried, tryptic peptide mixtures. Four labeled peptides are spiked in at different weight ratios as external controls.        | Label-free LC-MS/MS-based proteomics.                 | 1000 each        |
|                                                             | FDU_Quartet_Pipetide_D6_20171028   | /                               |                       |                 |                     |                                                                                                                              |                                                       |                  |
|                                                             | FDU_Quartet_Pipetide_F7_20171028   | /                               |                       |                 |                     |                                                                                                                              |                                                       |                  |
|                                                             | FDU_Quartet_Pipetide_M8_20171028   | /                               |                       |                 |                     |                                                                                                                              |                                                       |                  |
| Metabolite                                                  | FDU_Quartet_Metabolite_D5_20171028 | /                               | 10 <sup>6</sup> cells | 20171028        | 20200108            | Dried cell extracts from 1,000,000 cells using menthol: water solution. Ten external controls are spiked in at known amount. | LC-MS/MS-based metabolomics.                          | 1000 each        |
|                                                             | FDU_Quartet_Metabolite_D6_20171028 | /                               |                       |                 |                     |                                                                                                                              |                                                       |                  |
|                                                             | FDU_Quartet_Metabolite_F7_20171028 | /                               |                       |                 |                     |                                                                                                                              |                                                       |                  |
|                                                             | FDU_Quartet_Metabolite_M8_20171028 | /                               |                       |                 |                     |                                                                                                                              |                                                       |                  |

The Quartet multiomics reference materials were from monozygotic twin family, including father (F7), mother (M8), and monozygotic twin daughters (D5 and D6).

**Table 2 | Best practice guidelines for quality control and data integration of multiomics profiling using the Quartet reference materials**

| Procedures                                   | Recommendations                                                                                                                                                                                                                                                                                                                                                                                                                                                                             |
|----------------------------------------------|---------------------------------------------------------------------------------------------------------------------------------------------------------------------------------------------------------------------------------------------------------------------------------------------------------------------------------------------------------------------------------------------------------------------------------------------------------------------------------------------|
| <b>Data generation</b>                       | <p><b>QC metrics</b></p> <ul style="list-style-type: none"> <li>Reference-free: Signal-to-Noise Ratio (SNR) for measuring the ability to differentiate biologically different Quartet samples; Mendelian concordance rate (MCR) for genomic data.</li> <li>Reference-based: precision, recall and F1-score for qualitative values; Root Mean Square Error (RMSE) for quantitative values.</li> </ul>                                                                                        |
|                                              | <p><b>Thresholds</b></p> <ul style="list-style-type: none"> <li>Minimum requirement for a reliable measurement is to differentiate the inherent differences between different sample groups.</li> <li>Relative quality ranking among accumulating datasets can be obtained through the Quartet Data Portal.</li> </ul>                                                                                                                                                                      |
|                                              | <p><b>Implementation</b></p> <ul style="list-style-type: none"> <li>Perform a full performance validation for new labs, platforms, tests, or analytical pipelines.</li> <li>Participate in proficiency tests for independent assessment of test performance through inter-lab comparison.</li> </ul>                                                                                                                                                                                        |
| <b>Horizontal (Within-omics) integration</b> | <p><b>QC metrics</b></p> <ul style="list-style-type: none"> <li>Reference-free: Signal-to-Noise Ratio (SNR) for measuring the ability to differentiate biologically different Quartet samples; Mendelian concordance rate (MCR) for genomic data.</li> <li>Reference-based: precision, recall and F1-score for qualitative values; Root Mean Square Error (RMSE) for quantitative values.</li> </ul>                                                                                        |
|                                              | <p><b>Thresholds</b></p> <ul style="list-style-type: none"> <li>As long as the horizontally integrated datasets still have the ability to differentiate the different Quartet sample groups, the reliability of the follow-up exploratory studies is assured.</li> </ul>                                                                                                                                                                                                                    |
|                                              | <p><b>Implementation</b></p> <ul style="list-style-type: none"> <li>Profile the universal Quartet samples each batch along with study samples.</li> <li>Paradigm shift from “absolute” to “ratio”-based scaling by incorporating universal reference materials, which is inherently reproducible and batch-effect resistant.</li> </ul>                                                                                                                                                     |
| <b>Vertical (Cross-omics) integration</b>    | <p><b>QC metrics</b></p> <ul style="list-style-type: none"> <li>Quartet family based: Adjusted Rand Index to classify samples into four clusters (D5-D6-F7-M8) and three clusters (Daughters-Father-Mother). Vertical integration should have the ability to discover Quartet family-based sample clustering (Daughters-Father-Mother).</li> <li>Central dogma based: built-in interconnection across omics features. Root Mean Square Error (RMSE) based on reference datasets.</li> </ul> |
|                                              | <p><b>Thresholds</b></p> <ul style="list-style-type: none"> <li>ARI ranges from 0 to 1, the larger the better.</li> </ul>                                                                                                                                                                                                                                                                                                                                                                   |
|                                              | <p><b>Implementation</b></p> <ul style="list-style-type: none"> <li>Profile Quartet samples for each omic type along with study samples.</li> <li>Paradigm shift from “absolute” to “ratio”-based scaling by incorporating universal reference materials, which empowers vertical data integration.</li> </ul>                                                                                                                                                                              |



## 1007 **Methods**

### 1008 **Human subjects**

1009 This study was approved by the Institutional Review Board (IRB) of the School  
1010 of Life Sciences, Fudan University (BE2050). It was conducted under the  
1011 principles of the Declaration of Helsinki. Four healthy volunteers from a family  
1012 Quartet, as part of the Taizhou Longitudinal Study in Taizhou, Jiangsu, China  
1013 were enrolled and their peripheral blood was collected to establish the human  
1014 immortalized B-lymphoblastoid cell lines. All four donors signed informed  
1015 consent forms.

### 1016 **Establishment of the Quartet B-lymphoblastoid cell lines**

1017 We adopted the widely used protocol of using Epstein-Barr virus (EBV) to  
1018 establish immortalized lymphoblastoid cell lines (LCLs) (Wheeler and Dolan,  
1019 2012). Peripheral blood mononuclear cells (PBMCs) were isolated using a  
1020 lymphocyte separation solution (Ficoll). Naïve B cells were sorted by EasySep  
1021 Human naïve B Cell Enrichment Kit (STEMCELL, Catalog#19254), and  
1022 infected by Epstein-Barr virus (EBV) by centrifugation at 2000 rpm for 1 hour.  
1023 After incubation, the successfully infected and immortalized cells were  
1024 propagated in culture medium.

### 1025 **Cell culture**

1026 The Quartet LCLs were cultured in RPMI 1640 with 2 mM L-glutamine, 10%  
1027 heat-inactivated FBS (fetal bovine serum), and 1% PS (penicillin/streptomycin)  
1028 at 37 °C with 5% CO<sub>2</sub>. The cells were passaged every 72 hours at a 1:4 split  
1029 ratio.

### 1030 **Preparation of the first batch of DNA reference materials**

1031 To obtain the first batch of DNA reference materials (Lot NO 20160806), 2 ×  
1032 10<sup>9</sup> cells were harvested simultaneously for each cell line. Specifically, the cells  
1033 grew in suspension and were centrifuged at 300 g for 5 mins to obtain cell  
1034 pellets. The cell pellets were then washed twice with cold PBS.

1035 The DNA reference materials were purified using the DNA with Blood &  
1036 Cell Culture DNA Maxi Kit (Qiagen, Germany) according to the manufacturer's  
1037 instructions, divided into 1000 aliquots for each of the Quartet members, and  
1038 then labeled as Quartet\_DNA\_D5\_20160806, Quartet\_DNA\_D6\_20160806,

1039 Quartet\_DNA\_F7\_20160806, and Quartet\_DNA\_M8\_20160806. A single vial  
1040 contains approximate 10 µg of genomic DNA (220 ng/µL, 50 µL) in TE buffer  
1041 (10 mM TRIS, pH 8.0, 1 mM EDTA, pH 8.0).

1042 The DNA integrity and long-term stability were evaluated by Agilent 2200  
1043 TapeStation system (Agilent Technologies, USA). Concentrations were  
1044 determined by NanoDrop ND-2000 spectrophotometer (Thermo Fisher  
1045 Scientific, USA).

#### 1046 **Preparation of multiomics reference materials**

1047 To obtain the second batch of multiomics reference materials (Lot NO  
1048 20171028),  $1 \times 10^{10}$  cells were harvested for each cell line.

1049  $2 \times 10^9$  cells were used for preparing the second batch of DNA reference  
1050 materials (Lot NO 20171028) with the same method mentioned above for the  
1051 first batch of DNA. The second batch of DNA reference materials were stocked  
1052 in 1000 vials (220 ng/µL, 50 µL), and labeled with Quartet\_DNA\_D5\_20171028,  
1053 Quartet\_DNA\_D6\_20171028, Quartet\_DNA\_F7\_20171028, and  
1054 Quartet\_DNA\_M8\_20171028. The DNA QC and monitoring of stability were  
1055 conducted using the same methods mentioned above.

1056  $2 \times 10^9$  cells pretreated with TRIzol reagent were used for preparing RNA  
1057 reference materials using RNeasy Maxi kit (Qiagen, Germany) according to the  
1058 manufacturer's instructions. The extracted RNA was divided into 1000 aliquots  
1059 for the quartet members and labeled as Quartet\_RNA\_D5\_20171028,  
1060 Quartet\_RNA\_D6\_20171028, Quartet\_RNA\_F7\_20171028, and  
1061 Quartet\_RNA\_M8\_20171028. A single vial contains approximately 5 µg of RNA  
1062 in water (520 ng/µL, 10 µL). The RNA integrity and long-term stability were  
1063 assessed by a 2100 Bioanalyzer using RNA 6000 Nano chips (Agilent  
1064 Technologies, USA) and a Qsep 100 system (BiOptic Inc., Taiwan, China).  
1065 Concentrations were determined by NanoDrop ND-2000 spectrophotometer  
1066 (Thermo Fisher Scientific, USA).

1067  $2 \times 10^9$  cell pellets were used for preparing protein reference materials.  
1068 Two batches of peptides were prepared separately at Fudan University (on Nov  
1069 6<sup>th</sup>, 2017) and Novogene (on Jun 16<sup>th</sup>, 2020), China. Briefly, cells were lysed in  
1070 8 M urea lysis buffer supplemented with protease inhibitors. The extracted

1071 proteins were then digested using trypsin overnight at 37 °C. The peptides were  
1072 divided into 1000 aliquots and dried under vacuum for each batch of peptide  
1073 reference materials. Four chemically synthesized peptides with C13 and N15  
1074 labeled in valine at fixed weight ratios were spiked in the second batch of the  
1075 reference protein materials (Lot NO 20200616) as external controls. The spiked  
1076 peptides are YILAGVENSK (1:1,000), ADVTPADFSEWSK (1:3,000),  
1077 DGLDAASYAPVR (1:9,000), and DSPSAPVNVTVR (1:27,000).

1078  $1 \times 10^9$  cell pellets were used for preparing metabolite reference materials.  
1079 Briefly, cells were extracted using methanol:water = 6:1 solution. Ten  
1080 xenobiotics were spiked in at known amount in each vial as external controls.  
1081 They are Indoleacetic acid (25 pmol), Taurocholic acid (1 pmol), Glycocholic  
1082 acid (5 pmol), Cholic acid (25 pmol), Tauroursodeoxycholic acid (2.5 pmol),  
1083 Taurodeoxycholic acid (7.5 pmol), Glycoursodeoxycholic acid (1 pmol),  
1084 Glycodeoxycholic acid (0.5 pmol), Ursodeoxycholic acid (25 pmol), Deoxycholic  
1085 acid (50 pmol), and Sulfadimethoxine (5 pmol). The cell extracts were divided in  
1086 to 1000 vials and then dried under vacuum (Labconco, USA) to obtain the cell  
1087 extracts as metabolomics reference materials. Therefore, each vial contains  
1088 dried cell extracts from approximately  $10^6$  cells. The stability was monitored by  
1089 a P300 targeted metabolomics using a UPLC-MS/MS system in Human  
1090 Metabolomics Institute, Inc. (Shenzhen, China).

### 1091 **Whole-genome short-read sequencing data**

1092 **Data generation.** In order to evaluate the intra-lab performance of whole-  
1093 genome short-read sequencing, three replicates for each of the Quartet DNA  
1094 samples were sequenced in a fixed order (D5\_1, D6\_1, F7\_1, M8\_1, D5\_2,  
1095 D6\_2, F7\_2, M8\_2, D5\_3, D6\_3, F7\_3, and M8\_3). A total of 108 libraries from  
1096 six labs with either PCR or PCR-free protocol were used in this study. The  
1097 libraries were sequenced on short-read platforms, including Illumina HiSeq  
1098 XTen, Illumina NovaSeq, MGI MGISEQ-2000, and MGI DNBSEQ-T7. In  
1099 paired-end mode, the sequencing depth was at least 30×. More information  
1100 was detailed in the DNA accompanying paper (Ren et al., 2022).

1101 **Short-read sequencing read mapping and small variants calling.** The read  
1102 sequences were mapped to GRCh38 ([https://gdc.cancer.gov/about-data/gdc-](https://gdc.cancer.gov/about-data/gdc-data-processing/gdc-reference-files)  
1103 [data-processing/gdc-reference-files](https://gdc.cancer.gov/about-data/gdc-data-processing/gdc-reference-files)). Sentieon v2018.08.01

1104 (<https://www.sentieon.com/>) was used to analyze raw fastq files to GVCF files.  
1105 The workflow includes reads mapping by BWA-MEM, duplicates removing,  
1106 indel realignments, base quality score recalibration (BQSR), and variants  
1107 calling by HaplotyperCaller in GVCF mode. We used default settings for all the  
1108 processes.

1109 ***Feature encoding for small variants.*** To perform the calculation of SNR  
1110 values and vertical integration with other quantitative omics, we used the  
1111 encoding scheme for the genotypes of single nucleotide variants (SNVs). For  
1112 each genomic locus, we counted all alleles occurring in a total of 108 samples  
1113 from nine batches and then encoded them. Heterozygotes that were consistent  
1114 with the reference genome were encoded as 0, and the others were encoded  
1115 as 1. Furthermore, we used chromosome 1 to represent the whole genome for  
1116 the analysis.

#### 1117 **Whole-genome long-read sequencing data**

1118 ***Data generation.*** We evaluated the performance of structural variant detection  
1119 using different data analysis pipelines, without considering the technical  
1120 variation from library preparation. A total of 12 libraries from three long-read  
1121 sequencing platforms were generated for the Quartet DNA reference materials  
1122 (one replicate for each sample). The long-read sequencing platforms used are  
1123 Oxford NanoPore PromethION (~100x), PacBio Sequel (~100x), and PacBio  
1124 Sequel II (~30x).

1125 ***Long-read sequencing read mapping and structural variants calling.***  
1126 Reads were mapped to GRCh38 (GCA 000001405.15) from UCSC Genome  
1127 Brower (<http://hgdownload.soe.ucsc.edu/goldenPath/hg38/chromosomes/>).  
1128 Three mappers (NGMLR, minimap2 and pbmm2) and five callers (cuteSV,  
1129 NanoSV, Sniffles, pbsv and SVIM) were used to call SVs.

#### 1130 **DNA methylation data**

1131 ***Data generation.*** In order to evaluate the intra-lab performance of DNA  
1132 methylation, three replicates for each of the Quartet sample groups were  
1133 assayed in a fixed order (D5\_1, D6\_1, F7\_1, M8\_1, D5\_2, D6\_2, F7\_2, M8\_2,  
1134 D5\_3, D6\_3, F7\_3, and M8\_3). A total of 72 libraries from three labs with two  
1135 different protocols and Illumina EPIC Human Methylation microarray were used

1136 in this study. More information was detailed in the Quartet Data Portal  
1137 (<http://chinese-quartet.org/>).

1138 **Preprocessing of methylation data.** Raw idat files were processed using R  
1139 package ChAMP v2.20.1<sup>85</sup> and minfi v 1.36.0<sup>86</sup>. The single-sample Noob  
1140 (ssNoob) method<sup>87, 88</sup> was used to correct for background fluorescence and  
1141 dye-bias. Next, samples with a proportion of failed probes (probe detection p-  
1142 value > 0.01) above 0.1 were discarded. Probes that failed in more than 10%  
1143 of the remaining samples were removed. Probes with <3 beads in at least 5%  
1144 of samples per probe were also removed. All non-CpG probes, SNP-related  
1145 probes, multi-hit probes, probes located in chromosomes X and Y were filtered  
1146 out. After preprocessing, the methylation dataset contained 735,296 probes.  
1147 Finally, the corrected Meth and Unmeth signals were used to calculate M values  
1148 and  $\beta$  values. In this process, the offset was set to 100 and the beta threshold  
1149 to 0.001.

#### 1150 **Whole transcriptome sequencing data**

1151 **Data generation.** In order to evaluate the intra-lab performance of whole  
1152 transcriptome sequencing, three replicates for each of the Quartet sample  
1153 groups were sequenced in a fixed order (D5\_1, D6\_1, F7\_1, M8\_1, D5\_2, D6\_2,  
1154 F7\_2, M8\_2, D5\_3, D6\_3, F7\_3, and M8\_3). A total of 252 libraries from eight  
1155 labs with either poly-A selection or rRNA-removal protocol were used in this  
1156 study. On average, 100 million read-pairs per replicate were sequenced on  
1157 Illumina NovaSeq or MGI DNBSEQ-T7. More information was detailed in the  
1158 RNA accompanying paper (Yu et al., 2022).

1159 **Alignment and RNA quantification.** HISAT2 v2.1 was used for read alignment  
1160 to the GRCh38 (version: GRCh38\_snp\_tran, [https://genome-  
1161 idx.s3.amazonaws.com/hisat/grch38\\_snptran.tar.gz](https://genome-idx.s3.amazonaws.com/hisat/grch38_snptran.tar.gz))<sup>89</sup>. SAMtools v1.3.1 was  
1162 used to sort and convert SAM to BAM format<sup>90</sup>. StringTie v1.3.4 was used for  
1163 gene quantification using Ensembl reference annotation  
1164 (Homo\_sapiens.GRCh38.93.gtf)<sup>91</sup>. Ballgown v2.14.1 and prepDE.py  
1165 (<https://ccb.jhu.edu/software/stringtie/dl/prepDE.py>) were used to produce  
1166 gene expression matrix in Fragments Per Kilobase of transcript per Million  
1167 mapped reads (FPKM) for downstream analysis.

## 1168 **miRNA sequencing data**

1169 **Data generation.** In order to evaluate the intra-lab performance of miRNA  
1170 sequencing, three replicates for each of the Quartet sample groups were  
1171 sequenced in a fixed order (D5\_1, D6\_1, F7\_1, M8\_1, D5\_2, D6\_2, F7\_2, M8\_2,  
1172 D5\_3, D6\_3, F7\_3, and M8\_3). A total of 72 libraries from three labs with six  
1173 different protocols were used in this study. Illumina NovaSeq or HiSeq 2500  
1174 was used to generate the miRNAseq data. More information was detailed in the  
1175 Quartet Data Portal (<http://chinese-quartet.org/>).

1176 **Alignment and miRNA quantification.** The extra-cellular RNA processing  
1177 toolkit (exceRpt) was used to pre-process miRNAseq<sup>92</sup> data. The raw reads  
1178 were aligned to the hg38 genome and transcriptome of exceRptDB. Counts per  
1179 million mapped reads (CPM) quantifications of miRNA were extracted for the  
1180 downstream analysis.

## 1181 **Mass spectrometry (MS)-based proteomics data**

1182 **Data generation.** With the first batch of peptide reference materials, 312  
1183 libraries based on the LC-MS system were generated under a data-dependent  
1184 acquisition mode (DDA). Samples were analyzed in a random order for each  
1185 dataset, which contains three technical replicates for each of the four biological  
1186 samples (D5, D6, F7, and M8). Mass spectrometers from three platforms were  
1187 used: 1) Q Exactive hybrid quadrupole-Orbitrap series (Q Exactive, Q Exactive  
1188 Plus, Q Exactive HF and Q Exactive HF-X), Orbitrap Fusion Tribrid series  
1189 (Fusion and Fusion Lumos), Orbitrap Exploris 480 (all from Thermo Fisher  
1190 Scientific, Waltham, MA, USA); 2) Triple-TOF 6600 (from SCIEX, Foster City,  
1191 CA, USA), and 3) timsTOF Pro (from Bruker Daltonics, Bremen, Germany).

1192 The second batch of peptide reference materials were all analyzed in a fixed  
1193 order (D5\_1, D6\_1, F7\_1, M8\_1, D5\_2, D6\_2, F7\_2, M8\_2, D5\_3, D6\_3, F7\_3,  
1194 and M8\_3) on Q Exactive, Q Exactive HF, Q Exactive HF-X, and Orbitrap  
1195 Fusion Lumos, generating 36 libraries based on DDA mode and 36 libraries  
1196 based on data independent acquisition (DIA) mode. All parameters were set  
1197 according to the requirements from the manufacturers.

1198 **Peptide identification and protein quantification.** MS raw files generated by  
1199 the first batch of peptide reference materials were searched against the  
1200 National Center for Biotechnology Information's (NCBI) human RefSeq protein

1201 database (updated on 04-07-2013, 32,015 entries) using Firmiana 1.0 enabled  
1202 with Mascot 2.3 (Matrix Science Inc.)<sup>93</sup>. MS raw files generated by the second  
1203 batch of peptide reference materials were searched against UniProt  
1204 (<http://www.uniprot.org>) (release-2021\_04), using in-house pipelines from  
1205 different labs (MaxQuant 1.5.3.17, Spectronaut 14.4, mProphet or Proteome  
1206 Discoverer 2.2). Fixed modification is Carbamidomethyl (C), and Variable  
1207 modifications are oxidation (M) and acetyl (Protein N-term). Proteins with at  
1208 least 1 unique peptide with 1% FDR at the peptide level and Mascot ion score  
1209 greater than 20 were selected for further analysis. The fraction of total (FOT)  
1210 values were used for downstream analysis. FOT was defined as a protein's  
1211 iBAQ divided by the total iBAQ of all identified proteins within one sample. The  
1212 FOT was multiplied by  $10^5$  for the ease of presentation.

### 1213 **Mass spectrometry (MS)-based metabolomics data**

1214 **Data generation.** In order to evaluate the intra-lab performance of MS-based  
1215 metabolomics, three replicates for each of the Quartet sample groups were  
1216 profiled in a fixed order (D5\_1, D6\_1, F7\_1, M8\_1, D5\_2, D6\_2, F7\_2, M8\_2,  
1217 D5\_3, D6\_3, F7\_3, and M8\_3). The dried cell extracts were re-dissolved in  
1218 mobile phase in each lab, and a total of 264 libraries were generated from five  
1219 labs. The non-targeted metabolomics datasets were generated using AB  
1220 SCIEX Triple TOF6600 and Thermo Scientific Q Exactive mass spectrometer  
1221 systems in three different labs. The targeted metabolomics datasets were  
1222 generated using Waters Xevo TQ-S, AB SCIEX QTRAP 5500, and AB SCIEX  
1223 QTRAP 6500+ mass spectrometers in four labs. More information was detailed  
1224 in the metabolite accompanying paper (Zhang et al., 2022).

1225 **Compound identification and metabolite quantification.** Raw data were  
1226 extracted, peak-identified and QC processed using the in-house methods in  
1227 each lab. Compound identification was conducted using in-house library based  
1228 on the retention time/index (RI), mass to charge ratio (m/z), and MS spectral  
1229 data for each metabolite. Metabolite quantification was conducted using area-  
1230 under-the-curve or the concentration calculated by calibration curve using  
1231 standards of each metabolite. All the expression tables of metabolomics were  
1232 log<sub>2</sub> transformed and then normalized by Z-score transformation across all  
1233 metabolites for each sample.

## 1234 **Construction workflow of reference datasets**

1235 In the analysis of differentially expressed features (DEFs) and cross-omics  
1236 relationships, the methylation microarray data were converted to M values,  
1237 miRNA data were normalized to log<sub>2</sub>CPM, and RNA data were normalized to  
1238 log<sub>2</sub>FPKM, proteomics data were normalized to log<sub>2</sub>FOT, and metabolomics  
1239 data were log<sub>2</sub> transformed based on the quantitative intensity.

1240 Intra-batch quality control was performed to minimize the influence of  
1241 technical noises in the voting process. For each sample group, features that  
1242 were not detected in more than one technical replicate or that had large  
1243 variability (CV > 0.15 for methylation and > 0.3 for other omics) were excluded.  
1244 Afterward, we constructed the reference datasets of DEFs and cross-omics  
1245 feature relationships with the consensus voting approach described below.

1246 **Reference datasets for DEFs.** Cross-batch QC was performed following the  
1247 previous intra-batch QC. Features retained in more than a certain percentage  
1248 (70% for Methylation, miRNA, and RNA; 30% for protein and metabolite) of  
1249 batches were kept for the subsequent differential expression analysis.

1250 For each omics type, we analyzed the DEFs between D5 and F7 (D5/F7),  
1251 D5 and M8 (D5/M8), and F7 and M8 (F7/M8) within each batch using Student's  
1252 t-test. A feature was identified as differentially expressed when satisfying the  
1253 criteria of  $p < 0.05$  and log<sub>2</sub> fold change  $\geq 0.5$  or  $\leq -0.5$  for miRNA, RNA, proteins,  
1254 and metabolite profiling, or  $p < 0.05$  and log<sub>2</sub> fold change  $\geq 2$  or  $\leq -2$  for  
1255 methylation M values. Furthermore, we determined whether a DEM was up- or  
1256 down-regulated based on the positive or negative sign of the log<sub>2</sub> fold change.

1257 After identifying DEFs from each batch, we kept the DEFs presented in  
1258 more than 70% batches with consistent regulatory directionality (up or down).  
1259 Finally, we calculated the mean log<sub>2</sub> fold changes of all the retained intra-batch  
1260 DEFs as reference values.

1261 **Reference datasets for cross-omics feature relationships.** The reference  
1262 datasets contained cross-omics feature relationships between methylation and  
1263 miRNA, methylation and RNA, RNA and miRNA, RNA and protein levels,  
1264 protein and metabolite. We first performed feature selection to better identify  
1265 biologically meaningful correlations by annotating cross-omics features to the  
1266 same genes.



1267 For the methylation probes, we converted the features from the level of  
1268 probes to genes by taking the mean value on the promoter region (TSS200 or  
1269 TSS1500) to characterize the methylation level. For the other omics types, we  
1270 did not perform the transformation of feature values, but simply searched for  
1271 associated genes. RNA profiles were associated with gene names via Ensembl  
1272 ID. Target genes associated with specific miRNA in all of miRDB<sup>94</sup> (prediction  
1273 scores  $\geq 80$ ), miRTarBase<sup>95</sup> (support type is Functional MTI), and TargetScan<sup>96</sup>  
1274 would be considered as plausible. The proteomics profiles were characterized  
1275 at the level of gene names. Metabolites were associated with genes on the  
1276 same pathway based on the HMDB database<sup>97</sup>.

1277 Afterward, we exhaustively enumerated all the batch combinations of the  
1278 above five cross-omics types and conducted cross-batch QC. Associated  
1279 feature pairs retained in more than a certain number of batch combinations  
1280 were used for subsequent correlation analysis. This threshold is determined by  
1281 the product of the respective batch and rate (70% for Methylation, miRNA, and  
1282 RNA; 30% for protein and metabolite) of the two types of omics being compared.

1283 Next, we calculated the Pearson correlation coefficients for each feature  
1284 pair in each batch combination of the five cross-omics types. According to the  
1285 results of Pearson correlation analysis, the cross-omics relationships were  
1286 classified into positive ( $R \geq 0.5$ ,  $p < 0.05$ ), negative ( $R \leq -0.5$ ,  $p < 0.05$ ), and  
1287 none ( $p \geq 0.05$ ).

1288 Finally, we preserved the cross-omics relationships with the category that  
1289 account for more than 70% as the high-confidence relations. The reference  
1290 Pearson correlation coefficients were the mean value of the retained data.

## 1291 **Performance metrics**

1292 **Adjusted Rand Index (ARI).** ARI is a widely used QC metric to compare  
1293 clustering results against external criteria<sup>79</sup>. It measures the similarity of the true  
1294 labels and the clustering labels while ignoring permutations with chance  
1295 normalization, which means random assignments will have an ARI score close  
1296 to zero. ARI is in the range of -1 to 1, with 1 being the perfect clustering. ARI is  
1297 calculated based on RI as follows:

$$1298 \quad ARI = \frac{RI + expected(RI)}{max(RI) - expected(RI)}$$

1299 **Root Mean Square Error (RMSE).** RMSE is the standard deviation of the  
1300 residuals (prediction errors), a widely used statistic in bioinformatics and  
1301 machine learning. In this study, we used RMSE to measure the consistency of  
1302 DEGs detected from a dataset for a given pair of samples with those from the  
1303 reference DEFs, or “RMSE of DEFs”. Reference DEFs were integrated by  
1304 consensus voting the intra-batch results, and the reference difference was  
1305 defined by the mean value of log2 fold change of high-confidence batches.  
1306 RMSE is computed using the following equation:

$$1307 \quad RMSE = \sqrt{\frac{\sum_{i=1}^N (x_i - \hat{x}_i)^2}{N}}$$

1308 where  $N$  is the total number of features considered for evaluation,  $x_i - \hat{x}_i$  is the  
1309 error,  $\hat{x}_i$  is the log2 fold change after horizontal integration, and  $x_i$  is the log2  
1310 fold change of the corresponding feature in the reference dataset.

1311 **Signal-to-Noise Ratio (SNR).** SNR is a parameter based on the Quartet study  
1312 design for discriminating different types of reference samples. Based on  
1313 principal components analysis (PCA), SNR is defined as the ratio of the  
1314 average distance among different samples (like D5-1 vs. D6-1) to the average  
1315 distance among technical replicates (like D5-1 vs. D5-2). SNR is calculated as  
1316 follows:

$$1317 \quad SNR = 10 \times \log_{10} \left( \frac{m \times \binom{n}{2}}{\binom{m}{2} \times n \times n} \times \frac{\sum_{x=1}^m \sum_{y=x+1}^m \sum_{i=1}^n \sum_{j=1}^n \sum_{p=1}^2 W_p (PC_{p,i,x} - PC_{p,j,y})^2}{\sum_{x=1}^m \sum_{i=1}^n \sum_{j=i+1}^n \sum_{p=1}^2 W_p (PC_{p,i,x} - PC_{p,j,x})^2} \right)$$

1318 where  $m$  is the number of sample groups, while  $n$  is the number of replicates in  
1319 each sample group.  $W_p$  represents the  $p^{\text{th}}$  principal component of  
1320 variances.  $PC_{p,i,x}$ ,  $PC_{p,j,x}$  and  $PC_{p,j,y}$  represent the  $p^{\text{th}}$  component values of  
1321 replicate  $i$  and replicate  $j$  in sample group  $x$  or sample group  $y$ , respectively.

### 1322 **Balance of sample classes between batches**

1323 To evaluate the effect of the level of balance between the sample classes  
1324 across batches on the tasks of sample classification and the identification of  
1325 DEFs, we use the Jaccard index to represent the level of balance. The Jaccard  
1326 index is a common statistic used for gauging the similarity and diversity of two  
1327 sets.

1328 For the Quartet multiomics datasets, the total number of samples for each  
1329 of the four classes in each omic data type is the same (referred to as N). We  
1330 randomly selected a natural number n from 20% to 80% of N, then we drew n  
1331 samples from the sets of D5, D6, F7, and M8 and recorded the batch  
1332 information from which these samples came from. Further, we calculated the  
1333 Jaccard index between the batches of D5-D6, D6-F7, F7-M8, and M8-D5.  
1334 Finally, the mean value of the above four Jaccard indexes represented the  
1335 sample classes-batch balance.

### 1336 **Within-omic (Horizontal) integration**

1337 **Data preprocessing.** First, we randomly selected four batches for each  
1338 quantitative omic profiling (methylation, miRNA, RNA, protein, and metabolite).  
1339 We took three D5s with one D6, three D6s with one F7, three F7s with one M8,  
1340 and three M8s with one D5 from each of the four batches, to increase the  
1341 difficulty of the horizontal integration task.

1342 Next, we used different strategies for handling missing values for different  
1343 omics. For methylation data, features containing missing values were removed.  
1344 For other omics data, a feature will be retained when it is detected in more than  
1345 80% of the samples. For miRNAseq and RNAseq, a flooring value of 0.01 was  
1346 added to each gene's FPKM or CPM value before log<sub>2</sub> transformation. Missing  
1347 values were filled using the HM (Half of the Minimum) method.

1348 **Horizontal integration methods.** A total of six methods were used in this study  
1349 to horizontally integrate multiple batches of data, including Ratio, ComBat,  
1350 Harmony, RUVg, Z-Score, and Absolute. Ratio method uses the mean value of  
1351 D6 samples as the denominator to scale the expression of D5, F7, and M8 on  
1352 a feature-by-feature basis. ComBat was implemented by using the ComBat  
1353 function of sva v3.38.0 package<sup>98</sup>. Harmony was implemented by using the  
1354 HarmonyMatrix function of harmony v0.1.0 package<sup>73</sup>. RUVg was conducted  
1355 by using the RUVg function of RUVSeq v1.24.0 package<sup>74</sup>. Z-Score was  
1356 performed by scaling each batch feature-wise before merging multiple batches  
1357 to eliminate the batch effect. Absolute method refers to direct integration after  
1358 normalization.

### 1359 **Cross-omics (Vertical) integration**

1360 **Two scenarios for vertical integration.** (1) Integration of multi-batch  
1361 quantitative omic data, related to **Fig. 4**. After horizontally integrating 16  
1362 samples from four batches of methylation, miRNA, RNA, protein and metabolite,  
1363 vertical integration was performed using the five algorithms described above.  
1364 (2) Integration of single-batch quantitative and genomic data, related to **Fig. 5**.  
1365 The datasets of small variants were added to the integration task. Another  
1366 difference is that for each omics type we only used one batch of data, which  
1367 means that the vertically integrated results were not affected by problems that  
1368 exist in horizontal integration, e.g, batch effects.

1369 **Data preprocessing.** Prior to the vertical integration, we filtered out batches of  
1370 very good (top 20%) or bad (bottom 20%) quality within each omics based on  
1371 SNR values to reduce the impact of extreme quality datasets. In total, five  
1372 batches of DNA (SNV/Indel) data, two batches of DNA methylation profiles, two  
1373 batches of miRNA profiles, 11 batches of RNA profiles, 18 batches of  
1374 proteomics data, and 12 batches of metabolomics data were retained.

1375 To reduce the impact of large differences in dimensionality across  
1376 multiomics on the final results, for each omics type we selected the top 1000  
1377 most variable features based on the coefficient of variation (CV). After that, the  
1378 data matrices were centered and scaled to mean 0 and standard deviation 1  
1379 feature by feature. In addition, since intNMF and MCIA are methods based on  
1380 the principle of non-negative matrix decomposition, features containing  
1381 negative values were added with their absolute of minimum values to ensure  
1382 the non-negativity.

1383 **Vertical integration methods.** SNF<sup>5</sup>, iClusterBayes<sup>75</sup>, MOFA+<sup>76</sup>, MCIA<sup>77</sup>, and  
1384 intNMF<sup>78</sup> were used to integrate the multiomics data. SNFtool v2.3.1 package  
1385 was used with the parameter K (number of neighbors) set to the square of the  
1386 sample size after rounding, alpha (hyperparameter) to 0.05, and T (number of  
1387 iterations) to 10. iClusterPlus v1.26.0 package was used with the parameter K  
1388 (number of eigen features) set to the number of sample groups minus one.  
1389 MOFA2 v1.1.21 package was used with the default parameters, and PAM  
1390 clustering was performed on the latent factors of the MOFA+ model to obtain  
1391 the sample labels. MCIA was implemented by using omicade4 v1.30.0 package,  
1392 and PAM clustering was performed on the synthetic scores to get the sample

1393 labels. IntNMF v1.2.0 package was used with the default parameters. All other  
1394 parameters were set by default for the above five tools. A total of 50 iterations  
1395 of data integration were performed.

### 1396 **Similarity between D5 and D6**

1397 The SNF method was used to integrate data from different multiomics  
1398 combinations to explore the genomic inheritance patterns of the Quartet  
1399 identical twins during data integration. During integration, we randomly selected  
1400 a batch from each omics with a moderate quality (SNR in the 20% to 80% range)  
1401 and then calculated the inter-sample similarity matrix  $W$  using the SNFtool  
1402 v2.3.1 package. Specifically, for single-omic datasets (i.e., DNA or metabolite),  
1403 we treated multiple batches of moderate quality data from the same omics type  
1404 as different sources, also using SNF for integration and to obtain the  $W$  matrix.  
1405 As D5 and D6 each contained three technical replicates, there were nine  
1406 similarity results in the  $W$  matrix. We used their mean values as the similarity  
1407 between D5 and D6 obtained from one integration. To ensure the robustness  
1408 of the results, a total of 50 iterations were performed for the multiomics  
1409 combination.

### 1410 **Statistical analysis**

1411 All statistical analyses were performed using R statistical packages (version  
1412 4.0.5) (<https://www.r-project.org>). Pearson's correlation coefficients were  
1413 calculated using Hmisc v4.6.0 package ([https://CRAN.R-](https://CRAN.R-project.org/package=Hmisc)  
1414 [project.org/package=Hmisc](https://CRAN.R-project.org/package=Hmisc)). Differential expression analyses were  
1415 implemented using ChAMP v2.20.1 package for methylation EPIC data<sup>85</sup>, and  
1416 using rstatix v0.7.0 package for other omics data  
1417 (<https://github.com/kassambara/rstatix>). PCA was conducted with the  
1418 univariance scaling using the prcomp function. PAM clustering was  
1419 implemented using cluster v2.1.3 package ([https://CRAN.R-](https://CRAN.R-project.org/package=cluster)  
1420 [project.org/package=cluster](https://CRAN.R-project.org/package=cluster)). Data visualization was implemented using R  
1421 packages ggplot2 v3.3.6 (<https://ggplot2.tidyverse.org/>), ggsci v2.9  
1422 (<https://github.com/nanxstats/ggsci>), ggpubr v0.4.0  
1423 (<https://github.com/kassambara/ggpubr/>), ComplexHeatmap v2.6.2<sup>99</sup>, and  
1424 networkD3 v0.4 (<https://christophergandrud.github.io/networkD3/>).

1425

## 1426 **Materials availability**

1427 The Quartet multiomics reference materials generated in this study can be  
1428 accessed from the Quartet Data Portal (<https://chinese-quartet.org/>) under the  
1429 Administrative Regulations of the People's Republic of China on Human  
1430 Genetic Resources.

1431

## 1432 **Data and code availability**

1433 All the raw data, processed data, and reference datasets can be accessed from  
1434 the Quartet Data Portal (<https://chinese-quartet.org/>) under the Administrative  
1435 Regulations of the People's Republic of China on Human Genetic Resources.  
1436 They can also be accessed from the Genome Sequence Archive (GSA) of the  
1437 National Genomics Data Center of China with BioProject ID of PRJCA007703.  
1438 The source codes for the data analyses are available at  
1439 <https://github.com/chinese-quartet/>.

1440

## 1441 **References**

- 1442 5. Wang, B. et al. Similarity network fusion for aggregating data types on a genomic  
1443 scale. *Nat. Methods* **11**, 333-337 (2014).
- 1444 73. Korsunsky, I. et al. Fast, sensitive and accurate integration of single-cell data with  
1445 Harmony. *Nat. Methods* **16**, 1289-1296 (2019).
- 1446 74. Risso, D., Ngai, J., Speed, T.P. & Dudoit, S. Normalization of RNA-seq data using  
1447 factor analysis of control genes or samples. *Nat. Biotechnol.* **32**, 896-902 (2014).
- 1448 75. Mo, Q. et al. A fully Bayesian latent variable model for integrative clustering  
1449 analysis of multi-type omics data. *Biostatistics* **19**, 71-86 (2017).
- 1450 76. Argelaguet, R. et al. MOFA+: a statistical framework for comprehensive integration  
1451 of multi-modal single-cell data. *Genome Biol.* **21**, 111 (2020).
- 1452 77. Meng, C., Kuster, B., Culhane, A.C. & Gholami, A.M. A multivariate approach to  
1453 the integration of multi-omics datasets. *BMC Bioinform.* **15**, 162 (2014).
- 1454 78. Chalise, P. & Fridley, B.L. Integrative clustering of multi-level 'omic data based on  
1455 non-negative matrix factorization algorithm. *PLoS One* **12**, e0176278 (2017).
- 1456 79. Hubert, L. & Arabie, P. Comparing partitions. *J Classif.* **2**, 193-218 (1985).
- 1457 85. Tian, Y. et al. ChAMP: updated methylation analysis pipeline for Illumina  
1458 BeadChips. *Bioinformatics* **33**, 3982-3984 (2017).
- 1459 86. Aryee, M.J. et al. Minfi: a flexible and comprehensive Bioconductor package for  
1460 the analysis of Infinium DNA methylation microarrays. *Bioinformatics* **30**, 1363-  
1461 1369 (2014).

- 1462 87. Fortin, J.-P., Triche Jr, T.J. & Hansen, K.D. Preprocessing, normalization and  
1463 integration of the Illumina HumanMethylationEPIC array with minfi. *Bioinformatics*  
1464 **33**, 558-560 (2017).
- 1465 88. Triche Jr, T.J., Weisenberger, D.J., Van Den Berg, D., Laird, P.W. & Siegmund,  
1466 K.D. Low-level processing of Illumina Infinium DNA methylation beadarrays.  
1467 *Nucleic Acids Res.* **41**, e90-e90 (2013).
- 1468 89. Kim, D., Paggi, J.M., Park, C., Bennett, C. & Salzberg, S.L. Graph-based genome  
1469 alignment and genotyping with HISAT2 and HISAT-genotype. *Nat. Biotechnol.* **37**,  
1470 907-915 (2019).
- 1471 90. Li, H. A statistical framework for SNP calling, mutation discovery, association  
1472 mapping and population genetical parameter estimation from sequencing data.  
1473 *Bioinformatics* **27**, 2987-2993 (2011).
- 1474 91. Pertea, M. et al. StringTie enables improved reconstruction of a transcriptome from  
1475 RNA-seq reads. *Nat. Biotechnol.* **33**, 290-295 (2015).
- 1476 92. Rozowsky, J. et al. exceRpt: a comprehensive analytic platform for extracellular  
1477 RNA profiling. *Cell Syst.* **8**, 352-357. e353 (2019).
- 1478 93. Feng, J. et al. Firmiana: towards a one-stop proteomic cloud platform for data  
1479 processing and analysis. *Nat. Biotechnol.* **35**, 409-412 (2017).
- 1480 94. Wong, N. & Wang, X. miRDB: an online resource for microRNA target prediction  
1481 and functional annotations. *Nucleic Acids Res.* **43**, D146-D152 (2015).
- 1482 95. Huang, H.-Y. et al. miRTarBase 2020: updates to the experimentally validated  
1483 microRNA–target interaction database. *Nucleic Acids Res.* **48**, D148-D154 (2020).
- 1484 96. McGeary, S.E. et al. The biochemical basis of microRNA targeting efficacy.  
1485 *Science* **366**, eaav1741 (2019).
- 1486 97. Wishart, D.S. et al. HMDB 5.0: the human metabolome database for 2022. *Nucleic*  
1487 *Acids Res.* **50**, D622-D631 (2022).
- 1488 98. Leek, J.T., Johnson, W.E., Parker, H.S., Jaffe, A.E. & Storey, J.D. The sva  
1489 package for removing batch effects and other unwanted variation in high-  
1490 throughput experiments. *Bioinformatics* **28**, 882-883 (2012).
- 1491 99. Gu, Z., Eils, R. & Schlesner, M. Complex heatmaps reveal patterns and  
1492 correlations in multidimensional genomic data. *Bioinformatics* **32**, 2847-2849  
1493 (2016).
- 1494

1495 **Disclaimer**

1496 This manuscript reflects the views of the authors and does not necessarily  
1497 reflect those of the U.S. Food and Drug Administration. Any mention of  
1498 commercial products is for clarification only and is not intended as approval,  
1499 endorsement, or recommendation.

1500

1501 **Acknowledgements**

1502 This study was supported in part by National Key R&D Project of China  
1503 (2018YFE0201603, 2018YFE0201600, and 2017YFF0204605), the National  
1504 Natural Science Foundation of China (31720103909 and 32170657), Shanghai  
1505 Municipal Science and Technology Major Project (2017SHZDZX01), State Key  
1506 Laboratory of Genetic Engineering (SKLGE-2117), the 111 Project (B13016),  
1507 and the basic research funding in key fields supported by the National Institute  
1508 of Metrology of China (AKY1929 and AKYZD2202). We thank Fudan University  
1509 Taizhou Institute of Health Sciences for coordinating the Taizhou Longitudinal  
1510 Study and for recruiting volunteers used in the Chinese Quartet Project. Some  
1511 figures in this paper were created with BioRender.com.

1512

1513 **Author contributions**

1514 Y.Z., L.S., X.F., J.M.L., and C.D. conceived and oversaw the study. Y.Z. and  
1515 X.L. led the efforts on the immortalization of the B-lymphoblastoid cell lines.  
1516 Y.Z., W.H., D.B., Z.C., B.Y.L., R.L., S.S., H.W., F.Z., X.W., P.Z., and S.Z.  
1517 cultured the cell lines, isolated and purified the multiomics reference materials.  
1518 Y.Z., L.S., L.D., and R.Z. coordinated (epi-)genomic data generation and  
1519 analysis. Y.Z., W.H., L.Z., H.J., L.L., J.L., R.L., J.C., H.L., Z.K., D.W., F.D., H.J.,  
1520 S.S., H.W., R.Z., and S.Z. contributed to multiomics data generation. C.D. S.T.,  
1521 and Y.Z. coordinated proteomics data generation and analysis. Y.Z.  
1522 coordinated metabolomics data generation and analysis. Y.Z., Y.L., J.Y., L.D.,  
1523 R.Z., S.T., Y.Y., L.R., W.H., Y.M., Z.C., Q.C., Q.W.C., X.C., Y.G., B.L., B.Y.L.,  
1524 J.L., T.Q., E.S., J.S., N.Z., P.Z., R.Z., S.Z., A.S., J.W., J.W., J.X., H.H., W.X.,  
1525 L.J., C.D., J.M.L., X.F., W.T. and L.S. performed data analysis and/or



1526 interpretation. J.Y. managed the datasets. Y.Z., Y.L. and L.S. wrote and revised  
1527 the manuscript. All authors reviewed and approved the manuscript.

1528

1529 **Competing interests**

1530 None.

1531

1532 **Additional information**

1533 None.

1534 **Extended data**

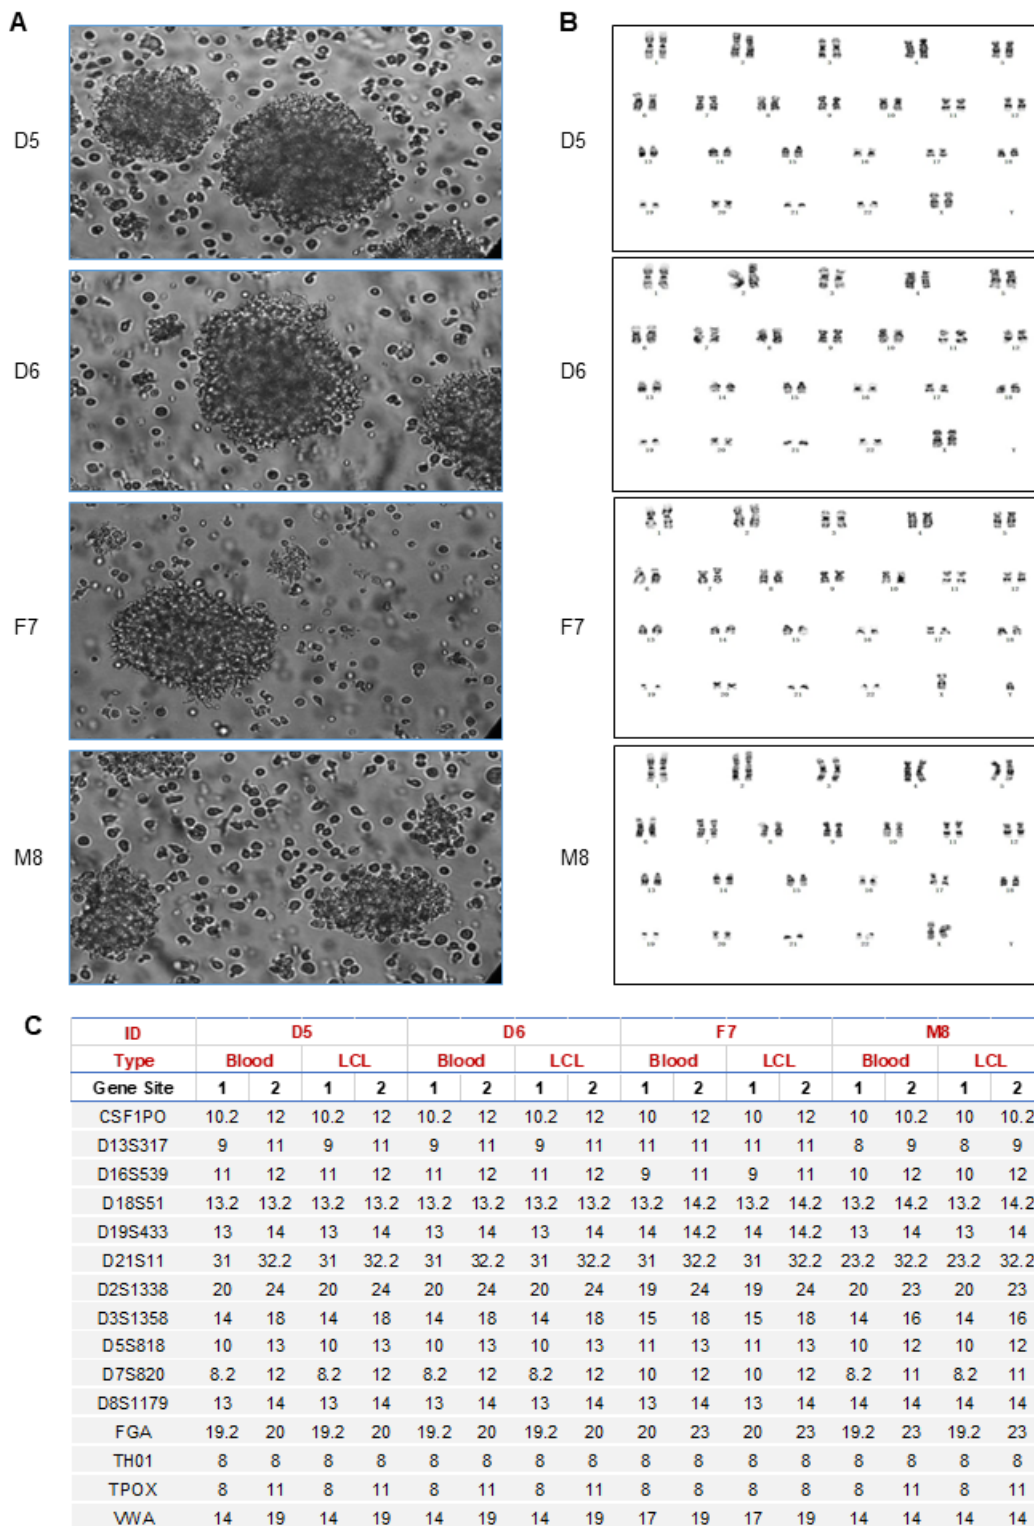

1535

1536 **Extended Data Fig. 1 | Characterization of the Quartet B-lymphoblastoid**

1537 **cell lines (LCLs).**

1538 **a**, Quartet LCLs were cultured in suspension with typical cell clusters under  
1539 phase-contrast microscopy (X400). **b**, Normal karyotypes of the LCLs were  
1540 shown. **c**, 15 STR loci were used for identification of Quartet monozygotic twins'  
1541 family. Importantly, there were no differences between results from DNAs  
1542 isolated from LCLs and primary blood.

The Quartet Project for Quality Control and Data Integration of Multiomics Profiling  
Roadmap to Quartet Project Manuscripts

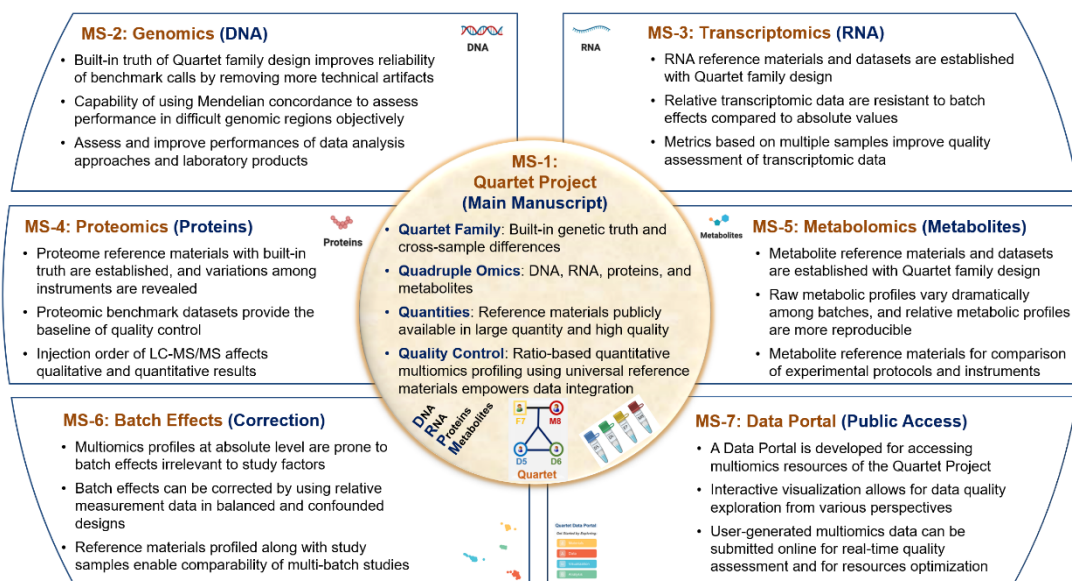

1543

1544 **Extended Data Fig. 2 | Roadmap to the Quartet Project manuscripts.**

1545 **MS-1:** Quartet project overview and main findings; **MS-2/3/4/5:**

1546 Genomics/Transcriptomics/Proteomics/Metabolomics reference materials and

1547 reference datasets; **MS-6:** Batch effects and correction; **MS-7:** Data portal for

1548 public access of Quartet Project resources.

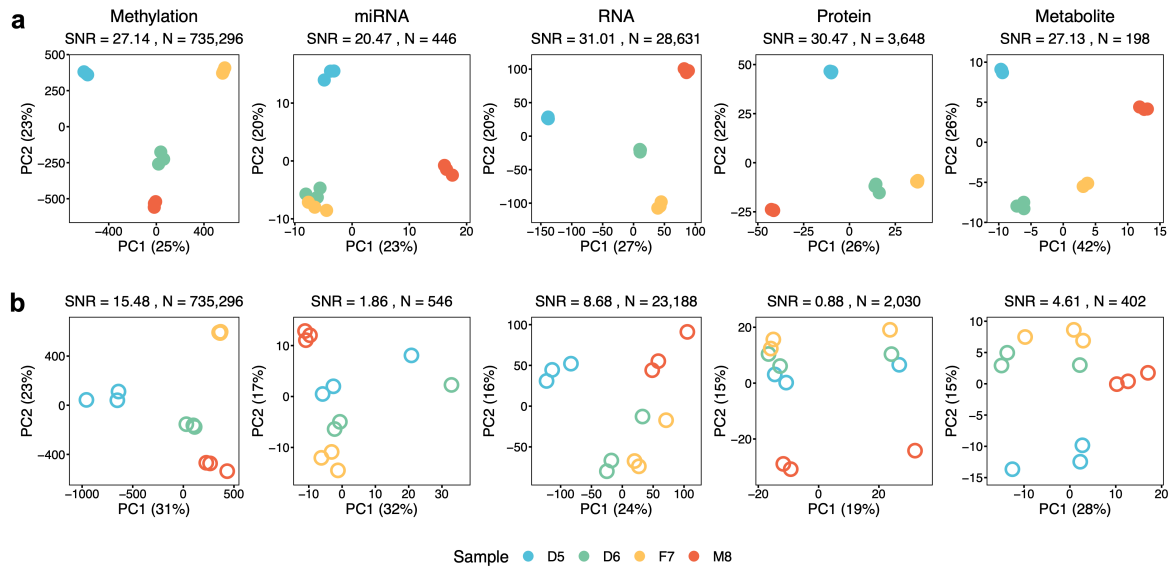

1549

1550 **Extended Data Fig. 3 | Quartet multi-sample based intra-batch Signal-to-**  
1551 **Noise Ratio (SNR) for performance evaluation of each omics profiling.**

1552 Intra-batch performance evaluation using SNR. Two batches of typically good  
1553 (a) and bad (b) quality datasets of methylomics, transcriptomics, proteomics,  
1554 and metabolomics were visualized by PCA plots. N is the number of features  
1555 of the matrix used to calculate the SNR for the batch.

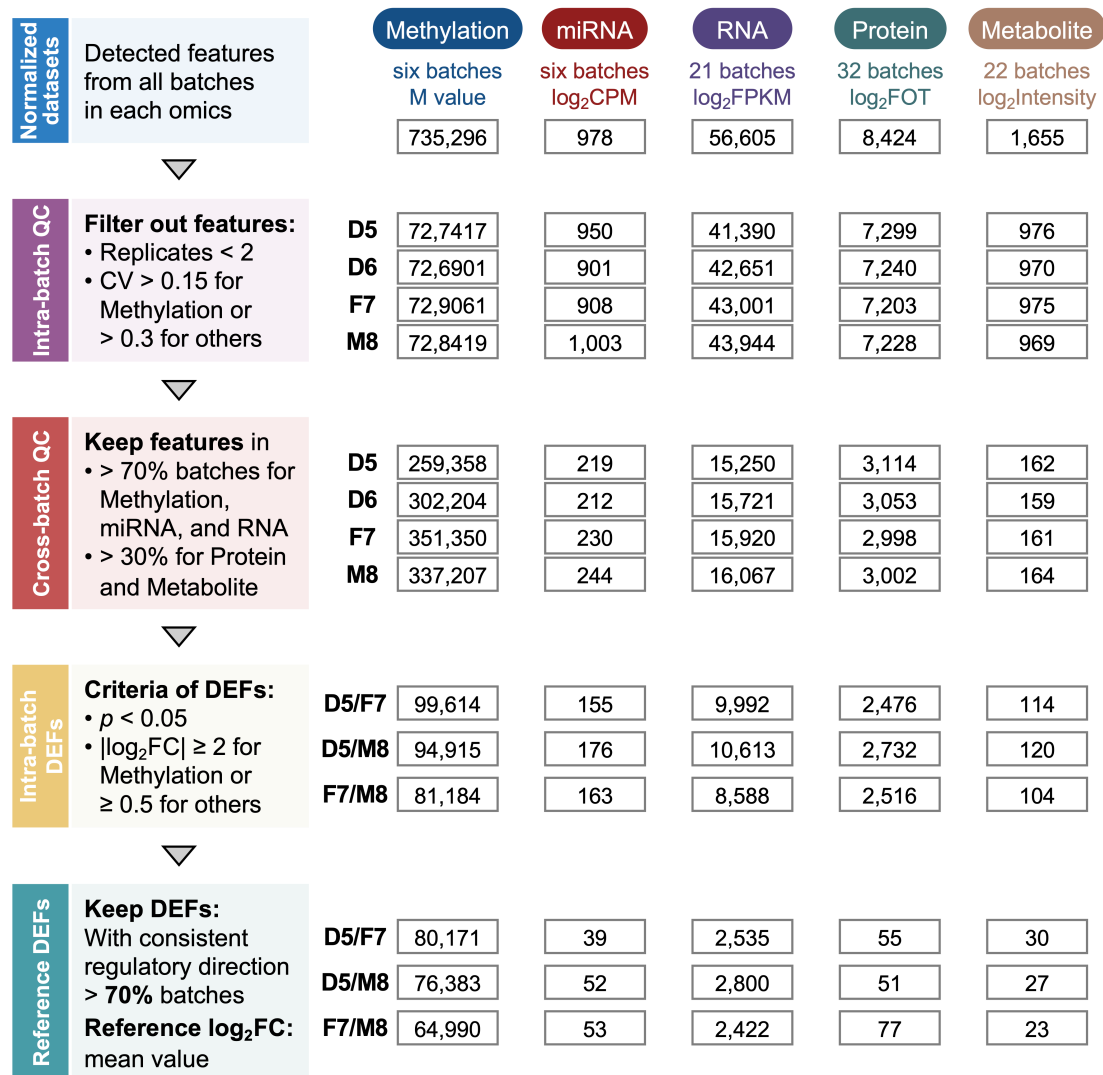

1556

1557 **Extended Data Fig. 4 | Workflow for the construction of reference datasets**  
 1558 **of differentially expressed features.**

1559 Reference datasets were constructed according to the following steps: (1)  
 1560 Identifying detectable multiomics features and per-sample normalization. (2)  
 1561 Intra-batch quality control. Features that were not detectable or had low  
 1562 technical reproducibility were filtered out. (3) Cross-batch quality control.  
 1563 Features that were able to be detected in a sufficient number of batches were  
 1564 retained. (4) Calculating intra-batch differentially expressed features (DEFs)  
 1565 using t-test analysis. DEFs were classified as up- or down-regulated based on  
 1566 the positive or negative sign of the log<sub>2</sub> fold change. (5) Voting based on the  
 1567 regulatory directionality (up or down) to screen the high confidence DEFs.

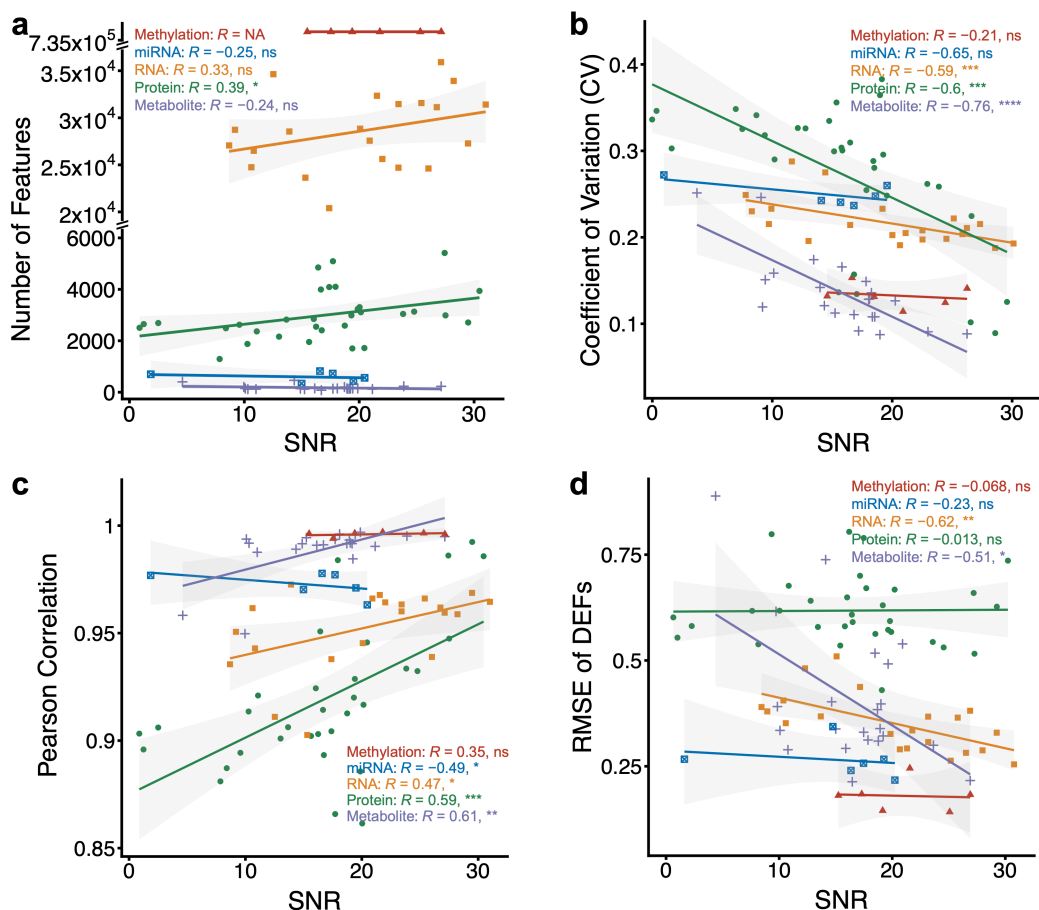

1568

1569 **Extended Data Fig. 5 | Scatter plots between SNR and the number of**  
 1570 **features, CV, Pearson correlation, and RMSE.**

1571 Data points represent one batch and solid lines indicate fitted curves obtained  
 1572 from linear regression. Red: Methylation; Blue: miRNA; Yellow: RNA; Green:  
 1573 Protein; Purple: Metabolite. The annotated correlations were Pearson  
 1574 correlation coefficients. ns,  $p \geq 0.05$  refers to not significant, \*  $p < 0.05$ , \*\*  $p < 0.01$ ,  
 1575 \*\*\*  $p < 0.001$ , \*\*\*\*  $p < 0.0001$ . **a**, Scatter plots between SNR and number of  
 1576 features. **b**, Scatter plots between SNR and Coefficient of Variation (CV). The  
 1577 CV for each batch is the mean value of the CVs between technical replicates  
 1578 on all features for the four sample groups. **c**, Scatter plots between SNR and  
 1579 Pearson correlation coefficient, which is the mean of the results of the two-by-  
 1580 two calculations of the three technical replicates for each sample group. **d**,  
 1581 Scatter plots between SNR and RMSE of DEFs, which is the mean of RMSEs  
 1582 of all features within one batch.

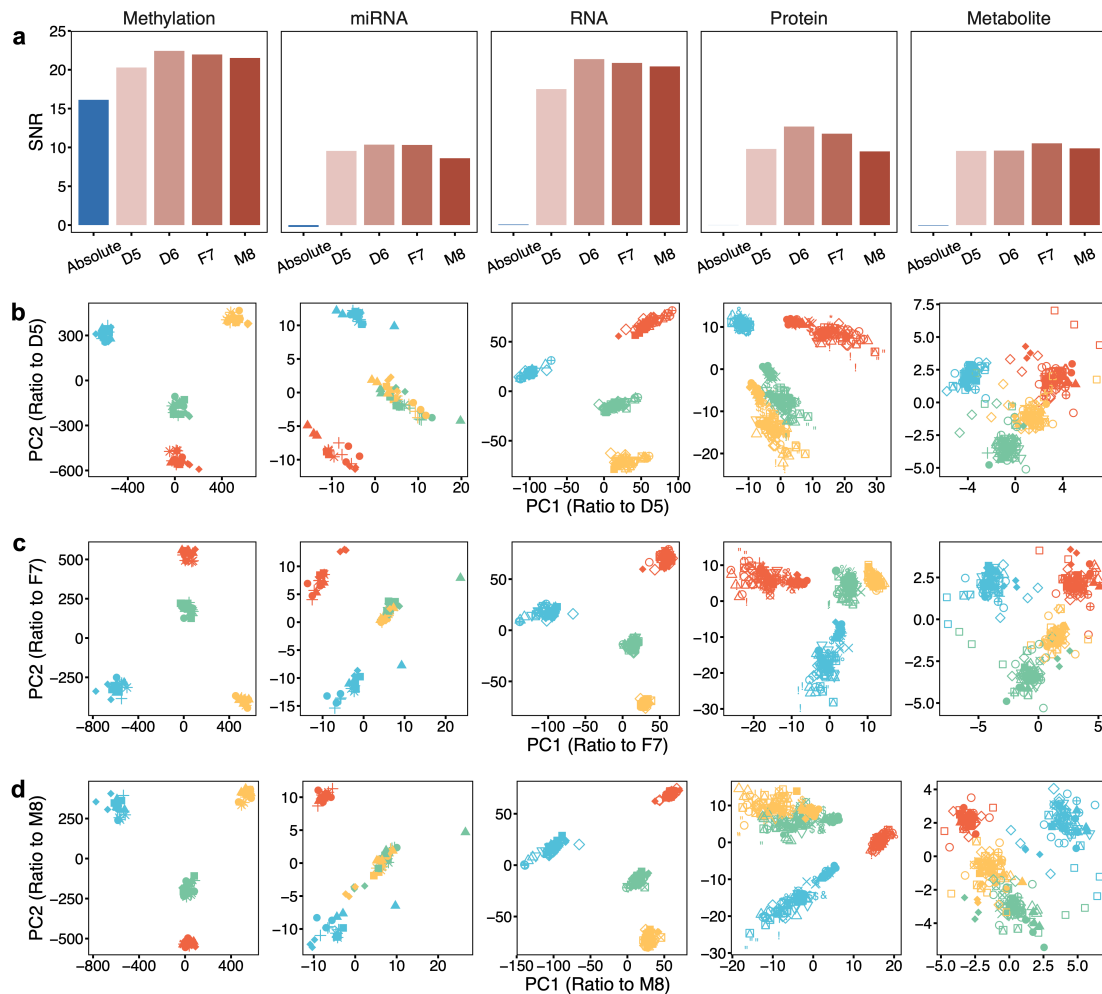

1583

1584 **Extended Data Fig. 6 | Ratio-based integration enhanced horizontal data**  
1585 **integration and was reference-sample independent.**

1586 **a**, Bar plots of Signal-to-Noise Ratio (SNR) of horizontal integration of all  
1587 batches of methylation, miRNAseq, RNAseq, proteomics, and metabolomics  
1588 datasets at absolute level (Blue) and ratio level (Red) with the choice of different  
1589 Quartet samples as the reference sample. **b-d**, PCA plots of horizontal  
1590 integration of omics datasets at ratio level by scaling to D5 (**b**), F7 (**c**), and M8  
1591 (**d**).



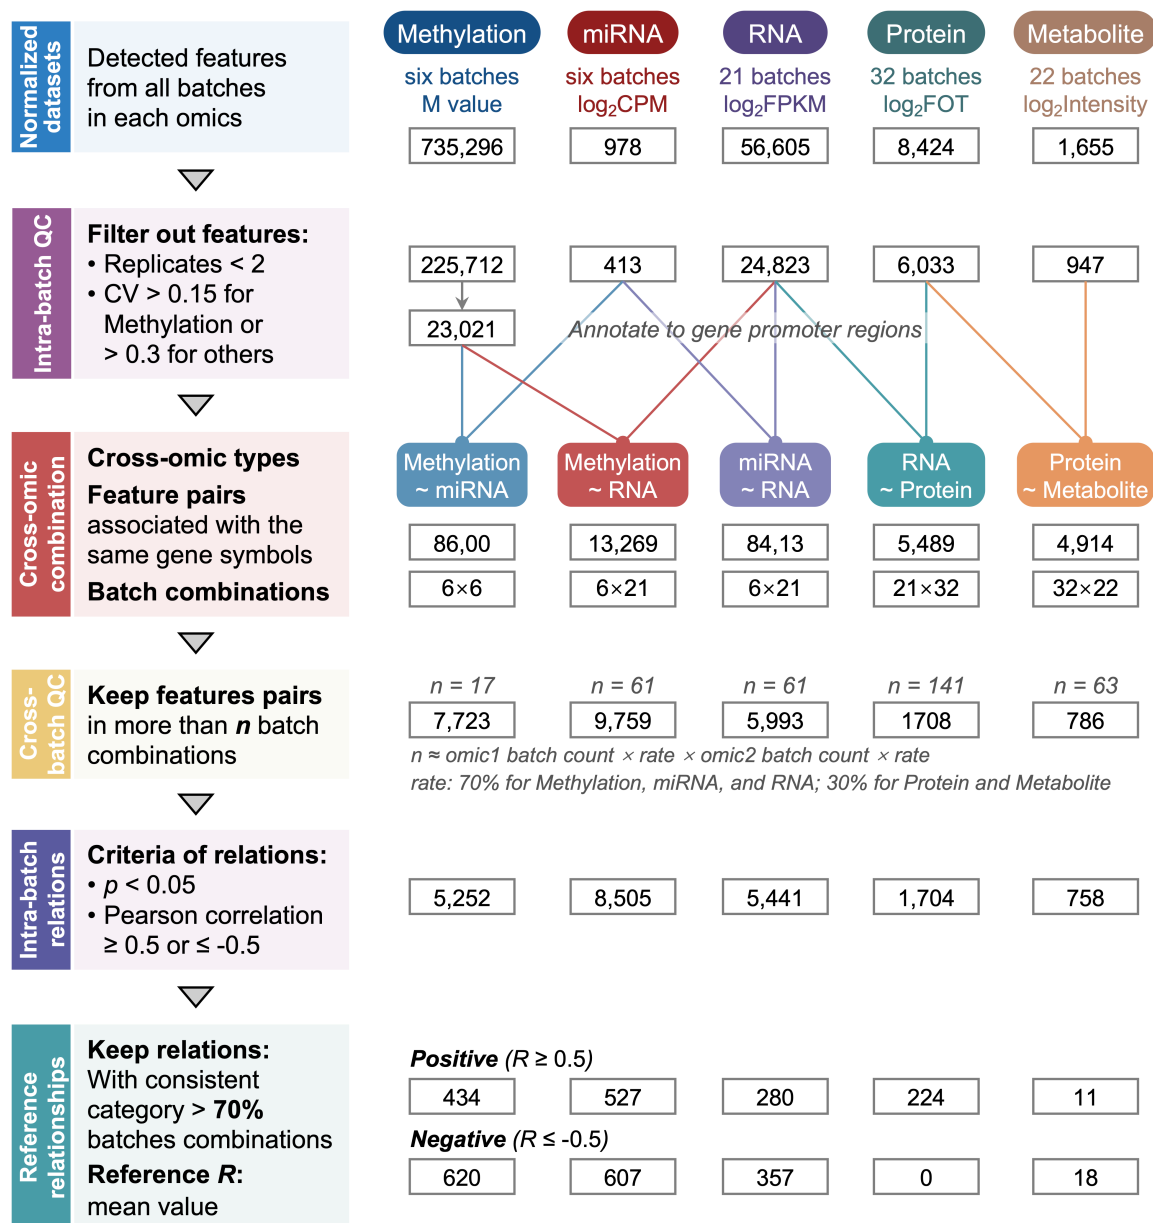

1592

1593 **Extended Data Fig. 7 | Workflow for the construction of reference datasets**  
1594 **of cross-omics feature relationships.**

1595 Reference datasets of cross-omics feature relationships were constructed  
1596 according to the following steps: (1) Identifying detectable multiomics features  
1597 and per-sample normalization. (2) Intra-batch quality control. Features that  
1598 were not detectable or had low technical reproducibility were filtered out. (3)  
1599 Identification of cross-omics feature pairs. Features associated with the same  
1600 genes were retained for the five cross-omic types, i.e., methylation and miRNA,  
1601 methylation and RNA, RNA and miRNA, RNA and protein, as well as protein  
1602 and metabolite. (4) Cross-batch quality control. Features retained in a sufficient

1603 number of batches were used for subsequent correlation analysis. (5)  
1604 Calculating Pearson correlation coefficients for each feature pair in each batch  
1605 combination. Cross-omics relationships were classified into positive ( $R \geq 0.5$ ,  
1606  $p < 0.05$ ), negative ( $R \leq -0.5$ ,  $p < 0.05$ ), and none ( $p \geq 0.05$ ). (6) Voting based  
1607 on the direction of the correlations (negative or positive) to screen the high-  
1608 confidence cross-omics feature relationships.

| Extended Data Table 1   Quartet multiomics datasets generated from multiple omics types, batches, labs, and platforms |                          |                                      |           |                              |            |
|-----------------------------------------------------------------------------------------------------------------------|--------------------------|--------------------------------------|-----------|------------------------------|------------|
| Omics Types                                                                                                           | Materials                | Platforms                            | Protocols | Labs                         | Replicates |
| WGS                                                                                                                   | Quartet_DNA_20160806     | ILLUMINA HiSeq XTen                  | PCR       | ARD, NVG, WUX                | 9          |
|                                                                                                                       |                          | ILLUMINA NovaSeq                     | PCR       | WUX                          | 3          |
|                                                                                                                       |                          |                                      | PCR-free  | BRG, ARD                     | 9          |
|                                                                                                                       |                          | MGI MGISEQ-2000                      | PCR       | BGI                          | 3          |
|                                                                                                                       | MGI DNBSEQ-T7            | PCR-free                             | WGE       | 3                            |            |
|                                                                                                                       | Quartet_DNA_20171028     | PacBio Sequel                        | CLR       | NOM                          | 1          |
|                                                                                                                       |                          | PacBio Sequel II                     | CLR       | ARD                          | 1          |
|                                                                                                                       |                          | Oxford NanoPore                      | /         | GRM                          | 1          |
| Methylation                                                                                                           | Quartet_DNA_20160806     | ILLUMINA 850K                        | /         | BIO, SNT, ENG                | 18         |
| RNA-seq                                                                                                               | Quartet_RNA_20171028     | ILLUMINA NovaSeq                     | PolyA     | ABC, ARD, WUX, FDU, VAZ      | 15         |
|                                                                                                                       |                          |                                      | RiboZero  | ABC, ARD, BRG, WUX, FDU, VAZ | 33         |
|                                                                                                                       |                          | MGI DNBSEQ-T7                        | PolyA     | BGI, VAZ                     | 6          |
|                                                                                                                       |                          |                                      | RiboZero  | BGI, VAZ, WEH                | 9          |
|                                                                                                                       |                          |                                      |           |                              |            |
| miRNA-seq                                                                                                             | Quartet_RNA_20171028     | ILLUMINA NovaSeq                     | Nextflex  | FDU                          | 6          |
|                                                                                                                       |                          | ILLUMINA NovaSeq                     | VAZ       | FDU                          | 3          |
|                                                                                                                       |                          | ILLUMINA NovaSeq                     | QIAseq    | WUX                          | 3          |
|                                                                                                                       |                          | ILLUMINA NovaSeq                     | TruSeq    | WUX                          | 3          |
|                                                                                                                       |                          | ILLUMINA HiSeq 2500                  | NEBNext   | ARD                          | 3          |
| Proteomics                                                                                                            | Quartet_Peptide_20171106 | Thermo Q Exactive                    | DDA       | NPS                          | 3          |
|                                                                                                                       |                          | Thermo Q Exactive-HF                 | DDA       | NPB                          | 3          |
|                                                                                                                       |                          |                                      | DIA       | BGI                          | 3          |
|                                                                                                                       |                          | Thermo Q Exactive-HFX                | DDA       | ZJU, TMO, PTM, APT, FDU      | 21         |
|                                                                                                                       |                          | Thermo Q Exactive-Plus               | DDA       | NPB, SCU                     | 6          |
|                                                                                                                       |                          | Thermo Orbitrap Fusion Lumos Tribrid | DDA       | NPB, THU, JNU, TMO, BGI, FDU | 27         |
|                                                                                                                       |                          |                                      |           |                              |            |

|              |                             |                                      |            |               |    |
|--------------|-----------------------------|--------------------------------------|------------|---------------|----|
|              |                             | Thermo Orbitrap Fusion               | DDA        | NPB, SIM, IRC | 9  |
|              |                             | Thermo Orbitrap Exploris 480         | DDA        | TMO           | 3  |
|              |                             | Bruker timsTOF                       | DDA        | BRK           | 3  |
|              |                             | SCIEX Triple TOF6600                 | DDA        | ABS           | 3  |
|              | Quartet_Peptide_202006_16   | Thermo Q Exactive                    | DDA        | APT           | 3  |
|              |                             | Thermo Q Exactive-HF                 | DIA        | BGI           | 3  |
|              |                             | Thermo Q Exactive-HFX                | DDA        | NVG           | 3  |
|              |                             |                                      | DIA        | APT           | 3  |
|              |                             | Thermo Orbitrap Fusion Lumos Tribrid | DDA        | FDU           | 3  |
|              |                             |                                      | DIA        | FDU           | 3  |
| Metabolomics | Quartet_Metabolite_20200108 | Thermo Scientific Q Exactive         | Untargeted | MBL           | 6  |
|              |                             | AB SCIEX Triple TOF6600              | Untargeted | APT, AQU      | 6  |
|              |                             | AB SCIEX QTRAP 6500+                 | Targeted   | NVG           | 3  |
|              |                             |                                      | Targeted   | MIB           | 3  |
|              |                             | AB SCIEX QTRAP 5500                  | Targeted   | APT           | 3  |
|              |                             | Waters Xevo TQ-S                     | Targeted   | MBP           | 42 |

1609
